# Supplementary material for: Multiple gene variants linked to Alzheimer’s-type clinical dementia via GWAS are also associated with non-Alzheimer’s neuropathologic entities
Source: PubMed Central journal article supplement — Neurobiol Dis. Author manuscript; Available in PMC 2022 Nov 14. (PMC9641973; doi:10.1016/j.nbd.2022.105880), 2022-09-30
Supplement: NIHMS1846498-supplement-SupplementaryMaterial.pdf [file NIHMS1846498-supplement-SupplementaryMaterial.pdf]

# KATSUMATA ET AL, SUPPLEMENTAL MATERIAL

## SUPPLEMENTAL TABLES:

- **Supplementary Table 1.** Analytical sample size for each available neuropathology in three datasets
- **Supplementary Table 2.** Analytical sample size for each available neuropathology in sensitivity analysis
- **Supplementary Table 3.** Characteristics in people with other ancestries
- **Supplementary Table 4.** List of Alzheimer's disease associated single nucleotide variants reported in Bellenguez et al. (2022)
- **Supplementary Table 5.** Association with Braak neurofibrillary tangle stage in people with European ancestry
- **Supplementary Table 6.** Association with neocortical neuritic plaques in people with European ancestry
- **Supplementary Table 7.** Association with TDP-43 in any brain regions in people with European ancestry
- **Supplementary Table 8.** Association with Lewy bodies in any brain regions in people with European ancestry
- **Supplementary Table 9.** Association with hippocampal sclerosis in people with European ancestry
- **Supplementary Table 10.** Association results from meta-analysis in people with European ancestry
- **Supplementary Table 11.** Association with Braak neurofibrillary tangle stage in people with other ancestries
- **Supplementary Table 12.** Association with neocortical neuritic plaques in people with other ancestries
- **Supplementary Table 13.** Association with TDP-43 in any brain regions in people with other ancestries
- **Supplementary Table 14.** Association with Lewy bodies in any brain regions in people with other ancestries
- **Supplementary Table 15.** Association with hippocampal sclerosis in people with other ancestries
- **Supplementary Table 16.** Association results from meta-analysis (ADSP WGS and ADGC) in people with other ancestries
- **Supplementary Table 17.** Summary of association from sensitivity analysis in people with European ancestry including cases with rare disease
- **Supplementary Table 18.** Summary of association from sensitivity analysis for different dichotomized neuropathologies
- **Supplementary Table 19.** Association of *APOE* diplotype from meta-analysis in people with European ancestry and other ancestries

## SUPPLEMENTAL FIGURES

- **Supplementary Figure 1.** First and second principal components plots along with 1000 genome reference samples.
- **Supplementary Figure 2.** First and second principal components plots along with 1000 genome reference samples.
- **Supplementary Figure 3.** First and second principal components plots along with 1000 genome reference samples.
- **Supplementary Figure 4.** Heatmap for  $-\log_{10}$  transformed p-values of all single nucleotide variants in people with European ancestry (excluding cases who had at least one rare disease).
- **Supplementary Figure 5.** Heatmap for  $-\log_{10}$  transformed p-values of all single nucleotide variants in people with European ancestry (including people with or without rare disease).

- **Supplementary Figure 6.** Heatmap for  $-\log_{10}$  transformed p-values of all single nucleotide variants in people with other ancestries.

**Supplementary Table 1.** Analytical sample size for each available neuropathology in three datasets

| Neuropathology                   | ADRC     |       | ROSMAP |
|----------------------------------|----------|-------|--------|
|                                  | ADSP WGS | ADGC  |        |
| European ancestry <sup>a</sup>   |          |       |        |
| Braak NFT stage                  | 1,026    | 2,191 | 1,266  |
| Neocortical neuritic plaques     | 1,028    | 2,195 | 1,266  |
| TDP-43 in any brain regions      | 364      | 797   | 1,176  |
| Lewy bodies in any brain regions | 1,023    | 2,185 | 1,225  |
| Hippocampal sclerosis            | 478      | 1,109 | 1,244  |
| Other ancestries                 |          |       |        |
| Braak NFT stage                  | 139      | 131   | 39     |
| Neocortical neuritic plaques     | 140      | 134   | 39     |
| TDP-43 in any brain regions      | 55       | 55    | 39     |
| Lewy bodies in any brain regions | 139      | 134   | 38     |
| Hippocampal sclerosis            | 68       | 86    | 37     |

<sup>a</sup> Cases who had at least one rare disease were excluded from people with European ancestry  
 NFT = neurofibrillary tangle; TDP-43 = TAR DNA binding protein 43 kDa; ADRC = Alzheimer's Disease Research Center; ADSP = Alzheimer's Disease Sequencing Project; WGS = whole genome sequencing; ADGC = Alzheimer's Disease Genetics Consortium; ROSMAP = Religious Orders Study (ROS) and Memory and Aging Project (MAP)

**Supplementary Table 2.** Analytical sample size for each available neuropathology in sensitivity analysis

| Neuropathology                   | ADRC     |       |
|----------------------------------|----------|-------|
|                                  | ADSP WGS | ADGC  |
| European ancestry <sup>a</sup>   |          |       |
| Braak NFT stage                  | 1,122    | 2,423 |
| Neocortical neuritic plaques     | 1,126    | 2,446 |
| TDP-43 in any brain regions      | 446      | 1,007 |
| Lewy bodies in any brain regions | 1,121    | 2,435 |
| Hippocampal sclerosis            | 643      | 1,355 |

<sup>a</sup> Cases who had rare disease were also included in people with European ancestry

NFT = neurofibrillary tangle; TDP-43 = TAR DNA binding protein 43 kDa; ADRC = Alzheimer's Disease Research Center; ADSP = Alzheimer's Disease Sequencing Project; WGS = whole genome sequencing; ADGC = Alzheimer's Disease Genetics Consortium

**Supplementary Table 3.** Characteristics in people with other ancestries

| Characteristic                          | ADRC                  |                   | ROSMAP<br>(n = 39) |
|-----------------------------------------|-----------------------|-------------------|--------------------|
|                                         | ADSP WGS<br>(n = 140) | ADGC<br>(n = 134) |                    |
| Age at death, mean $\pm$ SD             | 79.3 $\pm$ 11.9       | 83.7 $\pm$ 9.7    | 84.4 $\pm$ 8.1     |
| Years in education, mean $\pm$ SD       | 15.6 $\pm$ 10.7       | 15.3 $\pm$ 13.4   | 13.6 $\pm$ 4.6     |
| Sex, n (%)                              |                       |                   |                    |
| Male                                    | 60 (42.9)             | 61 (45.5)         | 8 (20.5)           |
| Female                                  | 80 (57.1)             | 73 (54.5)         | 31 (79.5)          |
| APOE, n (%)                             |                       |                   |                    |
| -/-                                     | 58 (41.4)             | 77 (57.5)         | 27 (69.2)          |
| -/ $\epsilon$ 4                         | 63 (45)               | 51 (38.1)         | 11 (28.2)          |
| $\epsilon$ 4/ $\epsilon$ 4              | 19 (13.6)             | 6 (4.5)           | 1 (2.6)            |
| Braak NFT stage, n (%)                  |                       |                   |                    |
| 0 – IV                                  | 47 (33.8)             | 64 (48.9)         | 27 (69.2)          |
| V/VI                                    | 92 (66.2)             | 67 (51.1)         | 12 (30.8)          |
| Neocortical neuritic plaques, n (%)     |                       |                   |                    |
| No – moderate                           | 52 (37.1)             | 74 (55.2)         | 26 (66.7)          |
| Frequent                                | 88 (62.9)             | 60 (44.8)         | 13 (33.3)          |
| TDP-43 in any brain regions, n (%)      |                       |                   |                    |
| No                                      | 37 (67.3)             | 39 (70.9)         | 27 (69.2)          |
| Yes <sup>a</sup>                        | 18 (32.7)             | 16 (29.1)         | 12 (30.8)          |
| Lewy bodies in any brain regions, n (%) |                       |                   |                    |
| No                                      | 78 (56.1)             | 94 (70.1)         | 31 (81.6)          |
| Yes <sup>b</sup>                        | 61 (43.9)             | 40 (29.9)         | 7 (18.4)           |
| Hippocampal sclerosis, n (%)            |                       |                   |                    |
| No                                      | 57 (83.8)             | 69 (80.2)         | 35 (94.6)          |
| Yes <sup>c</sup>                        | 11 (16.2)             | 17 (19.8)         | 2 (5.4)            |

<sup>a</sup> Observed in any regions including amygdala, hippocampus, entorhinal/inferior temporal cortex, and neocortex

<sup>b</sup> Observed in any brain regions including brainstem-predominant, limbic, neocortical, amygdala predominant, and olfactory bulb

<sup>c</sup> Observed in either unilateral or bilateral

SD = standard deviation; NFT = neurofibrillary tangle; TDP-43 = TAR DNA binding protein 43 kDa; ADRC = Alzheimer's Disease Research Center; ADSP = Alzheimer's Disease Sequencing Project; WGS = whole genome sequencing; ADGC = Alzheimer's Disease Genetics Consortium; ROSMAP = Religious Orders Study (ROS) and Memory and Aging Project (MAP)

**Supplementary Table 4.** List of Alzheimer's disease associated single nucleotide variants reported in Bellenguez et al. (2022)

| Variant     | Chr | Position <sup>a</sup> | Gene            | Minor/Major | MAF <sup>b</sup> |         |
|-------------|-----|-----------------------|-----------------|-------------|------------------|---------|
|             |     |                       |                 |             | EUR              | Others  |
| rs679515    | 1   | 207577223             | <i>CR1</i>      | T/C         | 0.17             | 0.039   |
| rs6733839   | 2   | 127135234             | <i>BIN1</i>     | T/C         | 0.38             | 0.40    |
| rs10933431  | 2   | 233117202             | <i>INPP5D</i>   | G/C         | 0.23             | 0.47    |
| rs6846529   | 4   | 11023507              | <i>CLNK</i>     | C/T         | 0.28             | 0.29    |
| rs6605556   | 6   | 32615322              | <i>HLA-DQA1</i> | G/A         | 0.15             | 0.12    |
| rs10947943  | 6   | 41036354              | <i>UNC5CL</i>   | A/G         | 0.11             | 0.11    |
| rs143332484 | 6   | 41161469              | <i>TREM2</i>    | T/C         | 0.011            | 0.0035  |
| rs75932628  | 6   | 41161514              | <i>TREM2</i>    | T/C         | 0.0050           | 0.0012  |
| rs60755019  | 6   | 41181270              | <i>TREML2</i>   | G/A         | 0                | 0.093   |
| rs7767350   | 6   | 47517390              | <i>CD2AP</i>    | T/C         | 0.25             | 0.17    |
| rs6966331   | 7   | 37844191              | <i>EPDR1</i>    | T/C         | 0.35             | 0.42    |
| rs7384878   | 7   | 100334426             | <i>SPDYE3</i>   | C/T         | 0.33             | 0.34    |
| rs11771145  | 7   | 143413669             | <i>EPHA1</i>    | A/G         | 0.36             | 0.45    |
| rs73223431  | 8   | 27362470              | <i>PTK2B</i>    | T/C         | 0.35             | 0.30    |
| rs11787077  | 8   | 27607795              | <i>CLU</i>      | T/C         | 0.39             | 0.38    |
| rs7912495   | 10  | 11676714              | <i>USP6NL</i>   | G/A         | 0.45             | 0.37    |
| rs10437655  | 11  | 47370397              | <i>SPI1</i>     | A/G         | 0.38             | 0.36    |
| rs1582763   | 11  | 60254475              | <i>MS4A4A</i>   | A/G         | 0.36             | 0.23    |
| rs3851179   | 11  | 86157598              | <i>EED</i>      | T/C         | 0.37             | 0.30    |
| rs74685827  | 11  | 121482368             | <i>SORL1</i>    | G/T         | 0.015            | 0.035   |
| rs11218343  | 11  | 121564878             | <i>SORL1</i>    | C/T         | 0.043            | 0.13    |
| rs17125924  | 14  | 52924962              | <i>FERMT2</i>   | G/A         | 0.080            | 0.13    |
| rs7401792   | 14  | 92464917              | <i>SLC24A4</i>  | G/A         | 0.35             | 0.36    |
| rs12590654  | 14  | 92472511              | <i>SLC24A4</i>  | A/G         | 0.34             | 0.41    |
| rs8025980   | 15  | 50701814              | <i>SPPL2A</i>   | G/A         | 0.33             | 0.42    |
| rs602602    | 15  | 58764824              | <i>MINDY2</i>   | A/T         | 0.31             | 0.47    |
| rs117618017 | 15  | 63277703              | <i>APH1B</i>    | T/C         | 0.14             | 0.021   |
| rs889555    | 16  | 31111250              | <i>BCKDK</i>    | T/C         | 0.28             | 0.41    |
| rs4985556   | 16  | 70660097              | <i>IL34</i>     | A/C         | 0.10             | 0.049   |
| rs12446759  | 16  | 81739398              | <i>PLCG2</i>    | G/A         | 0.38             | 0.49    |
| rs72824905  | 16  | 81908423              | <i>PLCG2</i>    | G/C         | 0.011            | 0.00075 |
| rs7225151   | 17  | 5233752               | <i>SCIMP</i>    | A/G         | 0.14             | 0.12    |
| rs199515    | 17  | 46779275              | <i>WNT3</i>     | G/C         | 0.22             | 0.081   |
| rs616338    | 17  | 49219935              | <i>ABI3</i>     | T/C         | 0.0070           | 0.00025 |
| rs2526377   | 17  | 58332680              | <i>TSPOAP1</i>  | G/A         | 0.46             | 0.45    |
| rs4277405   | 17  | 63471557              | <i>ACE</i>      | C/T         | 0.37             | 0.35    |
| rs12151021  | 19  | 1050875               | <i>ABCA7</i>    | A/G         | 0.34             | 0.38    |
| rs6014724   | 20  | 56423488              | <i>CASS4</i>    | G/A         | 0.089            | 0.18    |
| rs2830489   | 21  | 26775872              | <i>ADAMTS1</i>  | T/C         | 0.30             | 0.088   |
| rs141749679 | 1   | 109345810             | <i>SORT1</i>    | C/T         | 0                | 0.00050 |
| rs72777026  | 2   | 9558882               | <i>ADAM17</i>   | G/A         | 0.13             | 0.22    |
| rs17020490  | 2   | 37304796              | <i>PRKD3</i>    | C/T         | 0.16             | 0.37    |

|             |    |           |                         |         |        |         |
|-------------|----|-----------|-------------------------|---------|--------|---------|
| rs143080277 | 2  | 105749599 | <i>NCK2</i>             | C/T     | 0.0050 | 0.00050 |
| rs139643391 | 2  | 202878716 | <i>WDR12</i>            | T/TC    | 0.13   | 0.026   |
| rs16824536  | 3  | 155069722 | <i>MME</i>              | A/G     | 0.032  | 0.12    |
| rs61762319  | 3  | 155084189 | <i>MME</i>              | G/A     | 0.023  | 0.0032  |
| rs3822030   | 4  | 993555    | <i>IDUA</i>             | G/T     | 0.40   | 0.46    |
| rs2245466   | 4  | 40197226  | <i>RHOH</i>             | G/C     | 0.33   | 0.35    |
| rs112403360 | 5  | 14724304  | <i>ANKH</i>             | A/T     | 0.075  | 0.058   |
| rs62374257  | 5  | 86927378  | <i>COX7C</i>            | C/T     | 0.21   | 0.16    |
| rs871269    | 5  | 151052827 | <i>TNIP1</i>            | T/C     | 0.34   | 0.47    |
| rs113706587 | 5  | 180201150 | <i>RASGEF1C</i>         | A/G     | 0.10   | 0.056   |
| rs785129    | 6  | 114291731 | <i>HS3ST5</i>           | T/C     | 0.34   | 0.40    |
| rs6943429   | 7  | 7817263   | <i>UMAD1</i>            | T/C     | 0.42   | 0.47    |
| rs10952097  | 7  | 8204382   | <i>ICAI</i>             | T/C     | 0.11   | 0.27    |
| rs13237518  | 7  | 12229967  | <i>TMEM106B</i>         | A/C     | 0.40   | 0.34    |
| rs1160871   | 7  | 28129126  | <i>JAZF1</i>            | G/GTCTT | 0.24   | 0.28    |
| rs76928645  | 7  | 54873635  | <i>SEC61G</i>           | T/C     | 0.13   | 0.016   |
| rs1065712   | 8  | 11844613  | <i>CTSB</i>             | C/G     | 0.059  | 0.0047  |
| rs34173062  | 8  | 144103704 | <i>SHARPIN</i>          | A/G     | 0.089  | 0.017   |
| rs1800978   | 9  | 104903697 | <i>ABCA1</i>            | G/C     | 0.12   | 0.15    |
| rs7068231   | 10 | 60025170  | <i>ANK3</i>             | T/G     | 0.40   | 0.46    |
| rs6586028   | 10 | 80494228  | <i>TSPAN14</i>          | C/T     | 0.19   | 0.045   |
| rs6584063   | 10 | 96266650  | <i>BLNK</i>             | G/A     | 0.029  | 0.033   |
| rs7908662   | 10 | 122413396 | <i>PLEKHA1</i>          | G/A     | 0.47   | 0.49    |
| rs6489896   | 12 | 113281983 | <i>TPCN1</i>            | C/T     | 0.094  | 0.15    |
| rs7157106   | 14 | 105761758 | <i>IGH</i> gene cluster | A/G     | 0.34   | 0.23    |
| rs10131280  | 14 | 106665591 | <i>IGH</i> gene cluster | A/G     | 0.14   | 0.18    |
| rs3848143   | 15 | 64131307  | <i>SNX1</i>             | G/A     | 0.18   | 0.39    |
| rs12592898  | 15 | 78936857  | <i>CTSH</i>             | A/G     | 0.13   | 0.15    |
| rs1140239   | 16 | 30010081  | <i>DOC2A</i>            | T/C     | 0.38   | 0.31    |
| rs450674    | 16 | 79574511  | <i>MAF</i>              | C/T     | 0.36   | 0.20    |
| rs16941239  | 16 | 86420604  | <i>FOXF1</i>            | A/T     | 0.028  | 0.13    |
| rs56407236  | 16 | 90103687  | <i>PRDM7</i>            | A/G     | 0.058  | 0.053   |
| rs35048651  | 17 | 1728046   | <i>WDR81</i>            | T/TGAG  | 0.19   | 0.22    |
| rs2242595   | 17 | 18156140  | <i>MYO15A</i>           | A/G     | 0.12   | 0.27    |
| rs5848      | 17 | 44352876  | <i>GRN</i>              | T/C     | 0.30   | 0.46    |
| rs149080927 | 19 | 1854254   | <i>KLF16</i>            | G/GC    | 0.49   | 0.26    |
| rs9304690   | 19 | 49950060  | <i>SIGLEC11</i>         | T/C     | 0.24   | 0.20    |
| rs587709    | 19 | 54267597  | <i>LILRB2</i>           | C/T     | 0.31   | 0.46    |
| rs1358782   | 20 | 413334    | <i>RBCK1</i>            | A/G     | 0.27   | 0.14    |
| rs6742      | 20 | 63743088  | <i>SLC2A4RG</i>         | T/C     | 0.21   | 0.21    |
| rs2154481   | 21 | 26101558  | <i>APP</i>              | C/T     | 0.49   | 0.29    |

<sup>a</sup> GRCh38 assembly

<sup>b</sup> MAFs are calculated from 1000 genome phase 3 in Europeans (EUR) population and other populations (Africans, Admixed Americans, East Asians, and South Asians)

Chr = chromosome; MAF = minor allele frequency

**Supplementary Table 5.** Association with Braak neurofibrillary tangle stage in people with European ancestry

| Variant     | Gene            | Effect allele | ADRC                    |                      |                     |                      | ROSMAP<br>(n = 1,266) |         |
|-------------|-----------------|---------------|-------------------------|----------------------|---------------------|----------------------|-----------------------|---------|
|             |                 |               | ADSP WGS<br>(n = 1,028) |                      | ADGC<br>(n = 2,200) |                      | OR                    | P-value |
|             |                 |               | OR                      | P-value              | OR                  | P-value              |                       |         |
| rs679515    | <i>CR1</i>      | T             | 1.25                    | 0.071                | 1.27                | 0.0049               | 1.17                  | 0.18    |
| rs6733839   | <i>BIN1</i>     | T             | 1.42                    | $5.6 \times 10^{-4}$ | 1.26                | $5.1 \times 10^{-4}$ | 1.30                  | 0.0053  |
| rs10933431  | <i>INPP5D</i>   | G             | 0.93                    | 0.55                 | 0.84                | 0.021                | 0.86                  | 0.19    |
| rs6846529   | <i>CLNK</i>     | C             | 1.00                    | 0.99                 | 1.10 <sup>a</sup>   | 0.20                 | 1.21                  | 0.065   |
| drs6605556  | <i>HLA-DQA1</i> | G             | 0.80 <sup>b</sup>       | 0.085                | 0.96                | 0.66                 | 0.74                  | 0.023   |
| rs10947943  | <i>UNC5CL</i>   | A             | 1.02                    | 0.90                 | 0.87                | 0.14                 | 0.83                  | 0.16    |
| rs143332484 | <i>TREM2</i>    | T             | 1.93                    | 0.15                 | -                   | -                    | -                     | -       |
| rs75932628  | <i>TREM2</i>    | T             | 1.00                    | 1.00                 | -                   | -                    | -                     | -       |
| rs60755019  | <i>TREML2</i>   | G             | -                       | -                    | -                   | -                    | -                     | -       |
| rs7767350   | <i>CD2AP</i>    | T             | 0.99                    | 0.91                 | 1.09                | 0.24                 | 1.26                  | 0.022   |
| rs6966331   | <i>EPDR1</i>    | T             | 0.73                    | 0.0036               | 1.07                | 0.32                 | 0.93                  | 0.48    |
| rs7384878   | <i>SPDYE3</i>   | C             | 0.99                    | 0.94                 | 0.90                | 0.14                 | 0.76                  | 0.0073  |
| rs11771145  | <i>EPHA1</i>    | A             | 0.96                    | 0.70                 | 0.91                | 0.16                 | 0.92                  | 0.42    |
| rs73223431  | <i>PTK2B</i>    | T             | 0.98                    | 0.86                 | 1.10                | 0.17                 | 1.25                  | 0.015   |
| rs11787077  | <i>CLU</i>      | T             | 0.87                    | 0.17                 | 0.98                | 0.80                 | 0.93                  | 0.41    |
| rs7912495   | <i>USP6NL</i>   | G             | 1.04                    | 0.72                 | 1.07                | 0.32                 | 1.07                  | 0.46    |
| rs10437655  | <i>SPII</i>     | A             | 1.11                    | 0.31                 | 1.10                | 0.14                 | 1.23                  | 0.023   |
| rs1582763   | <i>MS4A4A</i>   | A             | 0.88                    | 0.20                 | 0.94                | 0.37                 | 1.00                  | 0.98    |
| rs3851179   | <i>EED</i>      | T             | 0.84                    | 0.083                | 0.89                | 0.075                | 0.91                  | 0.31    |
| rs74685827  | <i>SORL1</i>    | G             | 1.32                    | 0.49                 | 1.05                | 0.83                 | 1.18                  | 0.61    |
| rs11218343  | <i>SORL1</i>    | C             | 1.08                    | 0.73                 | 0.69                | 0.028                | 1.06                  | 0.81    |
| rs17125924  | <i>FERMT2</i>   | G             | 0.86                    | 0.41                 | 1.21                | 0.11                 | 1.22                  | 0.17    |
| rs7401792   | <i>SLC24A4</i>  | G             | 1.00                    | 0.98                 | 1.14                | 0.058                | 1.11                  | 0.27    |
| rs12590654  | <i>SLC24A4</i>  | A             | 0.88                    | 0.25                 | 0.98                | 0.77                 | 0.92                  | 0.39    |
| rs8025980   | <i>SPPL2A</i>   | G             | 1.16                    | 0.16                 | 0.96 <sup>c</sup>   | 0.50                 | 1.11                  | 0.25    |
| rs602602    | <i>MINDY2</i>   | A             | -                       | -                    | 0.93                | 0.28                 | 1.09                  | 0.41    |

|             |                 |   |      |        |                   |        |      |        |
|-------------|-----------------|---|------|--------|-------------------|--------|------|--------|
| rs117618017 | <i>APH1B</i>    | T | 1.07 | 0.65   | 1.08              | 0.43   | 1.45 | 0.0042 |
| rs889555    | <i>BCKDK</i>    | T | 1.12 | 0.33   | 0.88              | 0.067  | 1.01 | 0.94   |
| rs4985556   | <i>IL34</i>     | A | 1.02 | 0.91   | 0.99              | 0.91   | 1.07 | 0.63   |
| rs12446759  | <i>PLCG2</i>    | G | 0.86 | 0.12   | 0.97              | 0.70   | 0.88 | 0.18   |
| rs72824905  | <i>PLCG2</i>    | G | 0.54 | 0.31   | -                 | -      | -    | -      |
| rs7225151   | <i>SCIMP</i>    | A | 1.15 | 0.37   | 1.07              | 0.53   | 1.04 | 0.79   |
| rs199515    | <i>WNT3</i>     | G | 0.98 | 0.84   | 0.95              | 0.55   | 0.93 | 0.54   |
| rs616338    | <i>ABI3</i>     | T | 3.44 | 0.14   | -                 | -      | -    | -      |
| rs2526377   | <i>TSPOAP1</i>  | G | -    | -      | -                 | -      | 0.90 | 0.26   |
| rs4277405   | <i>ACE</i>      | C | 1.15 | 0.17   | 1.02              | 0.80   | 1.13 | 0.20   |
| rs12151021  | <i>ABCA7</i>    | A | 1.26 | 0.027  | 1.15              | 0.038  | -    | -      |
| rs6014724   | <i>CASS4</i>    | G | 1.13 | 0.52   | 0.82              | 0.072  | 1.19 | 0.27   |
| rs2830489   | <i>ADAMTS1</i>  | T | 1.04 | 0.71   | 1.03              | 0.72   | 0.89 | 0.24   |
| rs141749679 | <i>SORT1</i>    | C | 0.92 | 0.95   |                   |        |      |        |
| rs72777026  | <i>ADAM17</i>   | G | 0.99 | 0.91   | 1.04              | 0.66   | 1.22 | 0.13   |
| rs17020490  | <i>PRKD3</i>    | C | 0.87 | 0.29   | 0.98              | 0.86   | 1.09 | 0.50   |
| rs143080277 | <i>NCK2</i>     | C | 0.92 | 0.88   | -                 | -      | -    | -      |
| rs139643391 | <i>WDR12</i>    | T | 1.06 | 0.72   | 0.99 <sup>d</sup> | 0.96   | 0.81 | 0.14   |
| rs16824536  | <i>MME</i>      | A | 0.54 | 0.0088 | 0.65              | 0.0038 | 1.00 | 0.99   |
| rs61762319  | <i>MME</i>      | G | 1.21 | 0.54   | 1.18              | 0.44   | -    | -      |
| rs3822030   | <i>IDUA</i>     | G | -    | -      | -                 | -      | -    | -      |
| rs2245466   | <i>RHOH</i>     | G | 1.05 | 0.63   | 1.00              | 0.99   | 0.94 | 0.52   |
| rs112403360 | <i>ANKH</i>     | A | 1.34 | 0.14   | 1.08              | 0.54   | 1.21 | 0.25   |
| rs62374257  | <i>COX7C</i>    | C | 1.13 | 0.32   | 1.21              | 0.013  | 1.24 | 0.047  |
| rs871269    | <i>TNIP1</i>    | T | 0.99 | 0.96   | 0.95              | 0.43   | 0.95 | 0.62   |
| rs113706587 | <i>RASGEF1C</i> | A | 0.94 | 0.71   | 1.23              | 0.048  | 0.99 | 0.93   |
| rs785129    | <i>HS3ST5</i>   | T | 1.08 | 0.48   | 1.00              | 0.97   | 0.98 | 0.79   |
| rs6943429   | <i>UMAD1</i>    | T | 0.91 | 0.34   | 1.10              | 0.14   | -    | -      |
| rs10952097  | <i>ICA1</i>     | T | 1.16 | 0.36   | 1.06              | 0.61   | -    | -      |
| rs13237518  | <i>TMEM106B</i> | A | 1.11 | 0.31   | 1.15              | 0.036  | 1.10 | 0.30   |
| rs1160871   | <i>JAZF1</i>    | G | 0.83 | 0.12   | -                 | -      | 1.20 | 0.075  |



|             |                         |   |      |       |      |       |                   |       |
|-------------|-------------------------|---|------|-------|------|-------|-------------------|-------|
| rs76928645  | <i>SEC61G</i>           | T | 1.21 | 0.25  | 0.88 | 0.22  | 1.07              | 0.65  |
| rs1065712   | <i>CTSB</i>             | C | -    | -     | 0.94 | 0.66  | 0.77              | 0.21  |
| rs34173062  | <i>SHARPIN</i>          | A | -    | -     | 0.95 | 0.67  | -                 | -     |
| rs1800978   | <i>ABCA1</i>            | G | -    | -     | -    | -     | 1.17              | 0.25  |
| rs7068231   | <i>ANK3</i>             | T | 1.03 | 0.79  | 0.95 | 0.45  | 0.92              | 0.36  |
| rs6586028   | <i>TSPAN14</i>          | C | -    | -     | 0.91 | 0.22  | 1.01              | 0.96  |
| rs6584063   | <i>BLNK</i>             | G | 1.30 | 0.37  | 0.94 | 0.71  | 1.32 <sup>e</sup> | 0.18  |
| rs7908662   | <i>PLEKHA1</i>          | G | 0.98 | 0.87  | 0.99 | 0.86  | -                 | -     |
| rs6489896   | <i>TPCN1</i>            | C | 1.31 | 0.21  | 1.03 | 0.79  | 1.17              | 0.38  |
| rs7157106   | <i>IGH</i> gene cluster | A | -    | -     | 1.02 | 0.80  | -                 | -     |
| rs10131280  | <i>IGH</i> gene cluster | A | 0.80 | 0.13  | 0.97 | 0.71  | 1.12              | 0.41  |
| rs3848143   | <i>SNX1</i>             | G | 1.13 | 0.32  | 0.97 | 0.66  | 1.24              | 0.060 |
| rs12592898  | <i>CTSH</i>             | A | 0.83 | 0.20  | 0.91 | 0.34  | 0.88              | 0.37  |
| rs1140239   | <i>DOC2A</i>            | T | 0.96 | 0.70  | 0.90 | 0.10  | -                 | -     |
| rs450674    | <i>MAF</i>              | C | -    | -     | 0.87 | 0.032 | 1.04              | 0.69  |
| rs16941239  | <i>FOXF1</i>            | A | 1.04 | 0.89  | 1.03 | 0.88  | 0.82              | 0.52  |
| rs56407236  | <i>PRDM7</i>            | A | -    | -     | 1.04 | 0.79  | 0.81              | 0.24  |
| rs35048651  | <i>WDR81</i>            | T | 1.05 | 0.69  | -    | -     | 0.89              | 0.32  |
| rs2242595   | <i>MYO15A</i>           | A | 0.87 | 0.36  | 0.81 | 0.033 | 0.95              | 0.70  |
| rs5848      | <i>GRN</i>              | T | 1.02 | 0.88  | 0.99 | 0.85  | 0.83              | 0.066 |
| rs149080927 | <i>KLF16</i>            | G | 0.91 | 0.34  | -    | -     | 1.10              | 0.32  |
| rs9304690   | <i>SIGLEC11</i>         | T | 0.94 | 0.62  | 1.00 | 0.99  | 0.99              | 0.91  |
| rs587709    | <i>LILRB2</i>           | C | -    | -     | 1.02 | 0.78  | -                 | -     |
| rs1358782   | <i>RBCK1</i>            | A | 0.83 | 0.090 | 0.87 | 0.058 | 0.97              | 0.74  |
| rs6742      | <i>SLC2A4RG</i>         | T | 0.89 | 0.35  | 1.03 | 0.69  | 1.19              | 0.12  |
| rs2154481   | <i>APP</i>              | C | -    | -     | 0.92 | 0.16  | 1.04              | 0.67  |

<sup>a-d</sup> OR and P-value were computed by the proxy which was in perfect linkage disequilibrium block (i.e.,  $r^2 = 1$  and  $D' = 1$ )

<sup>a</sup> rs4351014, <sup>b</sup> rs6941385, <sup>c</sup> rs1291073, <sup>d</sup> rs6723704, <sup>e</sup> rs79663593

**Supplementary Table 6.** Association with neocortical neuritic plaques in people with European ancestry

| Variant     | Gene            | Effect allele | ADRC                    |         |                     |         | ROSMAP<br>(n = 1,266) |         |
|-------------|-----------------|---------------|-------------------------|---------|---------------------|---------|-----------------------|---------|
|             |                 |               | ADSP WGS<br>(n = 1,028) |         | ADGC<br>(n = 2,200) |         | OR                    | P-value |
|             |                 |               | OR                      | P-value | OR                  | P-value |                       |         |
| rs679515    | <i>CR1</i>      | T             | 1.13                    | 0.31    | 1.15                | 0.11    | 1.16                  | 0.18    |
| rs6733839   | <i>BIN1</i>     | T             | 1.13                    | 0.21    | 1.23                | 0.0016  | 1.24                  | 0.014   |
| rs10933431  | <i>INPP5D</i>   | G             | 1.05                    | 0.66    | 0.82                | 0.012   | 0.86                  | 0.14    |
| rs6846529   | <i>CLNK</i>     | C             | 1.11                    | 0.33    | 1.04 <sup>a</sup>   | 0.56    | 0.96                  | 0.68    |
| rs6605556   | <i>HLA-DQA1</i> | G             | 0.73 <sup>b</sup>       | 0.013   | 0.94                | 0.47    | 0.83                  | 0.13    |
| rs10947943  | <i>UNC5CL</i>   | A             | 0.99                    | 0.96    | 0.89                | 0.23    | 0.77                  | 0.032   |
| rs143332484 | <i>TREM2</i>    | T             | 1.72                    | 0.20    | -                   | -       | -                     | -       |
| rs75932628  | <i>TREM2</i>    | T             | 1.51                    | 0.36    | -                   | -       | -                     | -       |
| rs60755019  | <i>TREML2</i>   | G             | -                       | -       | -                   | -       | -                     | -       |
| rs7767350   | <i>CD2AP</i>    | T             | 1.00                    | 0.97    | 1.05                | 0.49    | 1.12                  | 0.22    |
| rs6966331   | <i>EPDR1</i>    | T             | 0.91                    | 0.39    | 1.04                | 0.59    | 1.00                  | 0.98    |
| rs7384878   | <i>SPDYE3</i>   | C             | 1.01                    | 0.95    | 0.87                | 0.047   | 0.82                  | 0.043   |
| rs11771145  | <i>EPHA1</i>    | A             | 1.00                    | 0.97    | 0.90                | 0.14    | 1.08                  | 0.38    |
| rs73223431  | <i>PTK2B</i>    | T             | 1.14                    | 0.20    | 1.09                | 0.23    | 1.21                  | 0.029   |
| rs11787077  | <i>CLU</i>      | T             | 0.99                    | 0.90    | 0.98                | 0.75    | 1.01                  | 0.88    |
| rs7912495   | <i>USP6NL</i>   | G             | 0.96                    | 0.65    | 0.93                | 0.30    | 1.09                  | 0.33    |
| rs10437655  | <i>SPII</i>     | A             | 1.09                    | 0.37    | 1.09                | 0.20    | 1.02                  | 0.84    |
| rs1582763   | <i>MS4A4A</i>   | A             | 0.81                    | 0.042   | 0.86                | 0.023   | 1.11                  | 0.25    |
| rs3851179   | <i>EED</i>      | T             | 0.81                    | 0.039   | 0.93                | 0.27    | 0.77                  | 0.0038  |
| rs74685827  | <i>SORL1</i>    | G             | 1.35                    | 0.44    | 1.14                | 0.57    | 1.07                  | 0.82    |
| rs11218343  | <i>SORL1</i>    | C             | 1.07                    | 0.76    | 0.92                | 0.63    | 1.29                  | 0.28    |
| rs17125924  | <i>FERMT2</i>   | G             | 1.13                    | 0.50    | 1.35                | 0.012   | 1.21                  | 0.17    |
| rs7401792   | <i>SLC24A4</i>  | G             | 1.08                    | 0.43    | 1.00                | 1.00    | 0.97                  | 0.77    |
| rs12590654  | <i>SLC24A4</i>  | A             | 0.74                    | 0.0047  | 1.04                | 0.53    | 1.19                  | 0.047   |
| rs8025980   | <i>SPPL2A</i>   | G             | 1.22                    | 0.059   | 0.98 <sup>c</sup>   | 0.76    | 1.08                  | 0.37    |
| rs602602    | <i>MINDY2</i>   | A             | -                       | -       | 0.87                | 0.051   | 1.08                  | 0.45    |

|             |                 |   |      |        |                   |       |      |        |
|-------------|-----------------|---|------|--------|-------------------|-------|------|--------|
| rs117618017 | <i>APH1B</i>    | T | 1.05 | 0.73   | 1.24              | 0.026 | 1.38 | 0.010  |
| rs889555    | <i>BCKDK</i>    | T | 1.18 | 0.13   | 0.86              | 0.044 | 1.16 | 0.12   |
| rs4985556   | <i>IL34</i>     | A | 1.06 | 0.73   | 0.85              | 0.12  | 0.95 | 0.70   |
| rs12446759  | <i>PLCG2</i>    | G | 0.74 | 0.0036 | 1.01              | 0.89  | 1.06 | 0.53   |
| rs72824905  | <i>PLCG2</i>    | G | 0.34 | 0.095  | -                 | -     | -    | -      |
| rs7225151   | <i>SCIMP</i>    | A | 1.22 | 0.20   | 1.01              | 0.91  | 1.04 | 0.76   |
| rs199515    | <i>WNT3</i>     | G | 1.14 | 0.28   | 0.94              | 0.47  | 0.97 | 0.80   |
| rs616338    | <i>ABI3</i>     | T | 1.82 | 0.38   | -                 | -     | -    | -      |
| rs2526377   | <i>TSPOAP1</i>  | G | -    | -      | -                 | -     | 0.90 | 0.24   |
| rs4277405   | <i>ACE</i>      | C | 1.15 | 0.18   | 0.91              | 0.16  | 0.99 | 0.92   |
| rs12151021  | <i>ABCA7</i>    | A | 1.33 | 0.0059 | 1.12              | 0.091 | -    | -      |
| rs6014724   | <i>CASS4</i>    | G | 0.94 | 0.72   | 0.80              | 0.054 | 0.97 | 0.86   |
| rs2830489   | <i>ADAMTS1</i>  | T | 1.08 | 0.47   | 1.05              | 0.49  | 0.92 | 0.36   |
| rs141749679 | <i>SORT1</i>    | C | 1.31 | 0.83   | -                 | -     | -    | -      |
| rs72777026  | <i>ADAM17</i>   | G | 1.07 | 0.64   | 1.19              | 0.072 | 1.25 | 0.070  |
| rs17020490  | <i>PRKD3</i>    | C | 0.77 | 0.051  | 1.00              | 0.99  | 1.27 | 0.055  |
| rs143080277 | <i>NCK2</i>     | C | 2.11 | 0.22   | -                 | -     | -    | -      |
| rs139643391 | <i>WDR12</i>    | T | 1.14 | 0.37   | 1.01 <sup>d</sup> | 0.91  | 0.83 | 0.15   |
| rs16824536  | <i>MME</i>      | A | 0.67 | 0.099  | 0.68              | 0.010 | 0.76 | 0.20   |
| rs61762319  | <i>MME</i>      | G | 1.56 | 0.15   | 1.29              | 0.22  | -    | -      |
| rs3822030   | <i>IDUA</i>     | G | -    | -      | -                 | -     | -    | -      |
| rs2245466   | <i>RHOH</i>     | G | 1.16 | 0.15   | 0.97              | 0.66  | 0.96 | 0.63   |
| rs112403360 | <i>ANKH</i>     | A | 0.93 | 0.68   | 0.99              | 0.96  | 1.51 | 0.0078 |
| rs62374257  | <i>COX7C</i>    | C | 0.98 | 0.87   | 1.04              | 0.63  | 1.15 | 0.19   |
| rs871269    | <i>TNIP1</i>    | T | 0.99 | 0.93   | 0.98              | 0.74  | 1.02 | 0.83   |
| rs113706587 | <i>RASGEF1C</i> | A | 1.10 | 0.54   | 1.18              | 0.12  | 0.77 | 0.076  |
| rs785129    | <i>HS3ST5</i>   | T | 0.85 | 0.13   | 0.98              | 0.83  | 0.92 | 0.35   |
| rs6943429   | <i>UMAD1</i>    | T | 0.90 | 0.31   | 0.98              | 0.75  | -    | -      |
| rs10952097  | <i>ICA1</i>     | T | 1.10 | 0.55   | 1.07              | 0.53  | -    | -      |
| rs13237518  | <i>TMEM106B</i> | A | 1.07 | 0.49   | 1.00              | 0.95  | 0.92 | 0.35   |
| rs1160871   | <i>JAZF1</i>    | G | 0.89 | 0.35   | -                 | -     | 1.04 | 0.73   |

|             |                         |   |      |      |      |        |                   |        |
|-------------|-------------------------|---|------|------|------|--------|-------------------|--------|
| rs76928645  | <i>SEC61G</i>           | T | 0.94 | 0.72 | 0.95 | 0.66   | 1.12              | 0.42   |
| rs1065712   | <i>CTSB</i>             | C | -    | -    | 1.09 | 0.54   | 0.87              | 0.48   |
| rs34173062  | <i>SHARPIN</i>          | A | -    | -    | 0.94 | 0.57   | -                 | -      |
| rs1800978   | <i>ABCA1</i>            | G | -    | -    | -    | -      | 1.29              | 0.048  |
| rs7068231   | <i>ANK3</i>             | T | 1.13 | 0.23 | 1.01 | 0.84   | 0.95              | 0.53   |
| rs6586028   | <i>TSPAN14</i>          | C | -    | -    | 0.91 | 0.27   | 0.95              | 0.61   |
| rs6584063   | <i>BLNK</i>             | G | 1.14 | 0.65 | 0.98 | 0.92   | 0.82 <sup>e</sup> | 0.36   |
| rs7908662   | <i>PLEKHA1</i>          | G | 1.01 | 0.90 | 0.96 | 0.57   | -                 | -      |
| rs6489896   | <i>TPCN1</i>            | C | 1.21 | 0.35 | 1.19 | 0.18   | 0.81              | 0.24   |
| rs7157106   | <i>IGH</i> gene cluster | A | -    | -    | 1.21 | 0.0060 | -                 | -      |
| rs10131280  | <i>IGH</i> gene cluster | A | 0.97 | 0.82 | 1.00 | 0.99   | 1.01              | 0.92   |
| rs3848143   | <i>SNX1</i>             | G | 1.09 | 0.44 | 1.11 | 0.19   | 1.24              | 0.052  |
| rs12592898  | <i>CTSH</i>             | A | 1.12 | 0.44 | 0.95 | 0.59   | 0.70              | 0.0081 |
| rs1140239   | <i>DOC2A</i>            | T | 1.11 | 0.31 | 0.86 | 0.026  | -                 | -      |
| rs450674    | <i>MAF</i>              | C | -    | -    | 0.87 | 0.035  | 0.93              | 0.40   |
| rs16941239  | <i>FOXF1</i>            | A | 0.78 | 0.40 | 0.92 | 0.68   | 1.05              | 0.87   |
| rs56407236  | <i>PRDM7</i>            | A | -    | -    | 0.94 | 0.64   | 0.93              | 0.67   |
| rs35048651  | <i>WDR81</i>            | T | 1.06 | 0.61 | -    | -      | 1.16              | 0.14   |
| rs2242595   | <i>MYO15A</i>           | A | 0.90 | 0.51 | 0.81 | 0.038  | 1.08              | 0.57   |
| rs5848      | <i>GRN</i>              | T | 1.02 | 0.84 | 0.94 | 0.39   | 0.99              | 0.89   |
| rs149080927 | <i>KLF16</i>            | G | 0.87 | 0.18 | -    | -      | 1.09              | 0.33   |
| rs9304690   | <i>SIGLEC11</i>         | T | 0.96 | 0.72 | 0.98 | 0.84   | 1.02              | 0.85   |
| rs587709    | <i>LILRB2</i>           | C | -    | -    | 0.99 | 0.88   | -                 | -      |
| rs1358782   | <i>RBCK1</i>            | A | 0.87 | 0.23 | 0.86 | 0.044  | 0.81              | 0.044  |
| rs6742      | <i>SLC2A4RG</i>         | T | 1.04 | 0.72 | 1.03 | 0.73   | 1.06              | 0.57   |
| rs2154481   | <i>APP</i>              | C | -    | -    | 0.91 | 0.15   | 0.92              | 0.33   |

<sup>a-d</sup> OR and P-value were computed by the proxy which was in perfect linkage disequilibrium block (i.e.,  $r^2 = 1$  and  $D' = 1$ )

<sup>a</sup> rs4351014, <sup>b</sup> rs6941385, <sup>c</sup> rs1291073, <sup>d</sup> rs6723704, <sup>e</sup> rs79663593

**Supplementary Table 7.** Association with TDP-43 in any brain regions in people with European ancestry

| Variant     | Gene            | Effect allele | ADRC                    |         |                     |         | ROSMAP      |         |
|-------------|-----------------|---------------|-------------------------|---------|---------------------|---------|-------------|---------|
|             |                 |               | ADSP WGS<br>(n = 1,028) |         | ADGC<br>(n = 2,200) |         | (n = 1,266) |         |
|             |                 |               | OR                      | P-value | OR                  | P-value | OR          | P-value |
| rs679515    | <i>CR1</i>      | T             | 0.98                    | 0.93    | 1.27                | 0.080   | 1.18        | 0.14    |
| rs6733839   | <i>BIN1</i>     | T             | 1.05                    | 0.78    | 1.11                | 0.33    | 1.02        | 0.83    |
| rs10933431  | <i>INPP5D</i>   | G             | 0.92                    | 0.69    | 0.96                | 0.77    | 0.87        | 0.17    |
| rs6846529   | <i>CLNK</i>     | C             | 1.19                    | 0.37    | 1.03 <sup>a</sup>   | 0.81    | 1.13        | 0.22    |
| rs6605556   | <i>HLA-DQA1</i> | G             | 0.86 <sup>b</sup>       | 0.55    | 1.15                | 0.33    | 0.88        | 0.29    |
| rs10947943  | <i>UNC5CL</i>   | A             | 0.69                    | 0.15    | 0.99                | 0.94    | 0.93        | 0.53    |
| rs143332484 | <i>TREM2</i>    | T             | 0.80                    | 0.77    | -                   | -       | -           | -       |
| rs75932628  | <i>TREM2</i>    | T             | 0.48                    | 0.51    | -                   | -       | -           | -       |
| rs60755019  | <i>TREML2</i>   | G             | -                       | -       | -                   | -       | -           | -       |
| rs7767350   | <i>CD2AP</i>    | T             | 1.19                    | 0.37    | 1.08                | 0.50    | 0.93        | 0.44    |
| rs6966331   | <i>EPDR1</i>    | T             | 0.88                    | 0.52    | 1.11                | 0.35    | 1.02        | 0.82    |
| rs7384878   | <i>SPDYE3</i>   | C             | 0.78                    | 0.22    | 1.07                | 0.59    | 1.02        | 0.85    |
| rs11771145  | <i>EPHA1</i>    | A             | 0.99                    | 0.96    | 1.16                | 0.20    | 0.90        | 0.27    |
| rs73223431  | <i>PTK2B</i>    | T             | 1.02                    | 0.91    | 0.87                | 0.21    | 1.14        | 0.15    |
| rs11787077  | <i>CLU</i>      | T             | 0.93                    | 0.68    | 1.03                | 0.79    | 1.07        | 0.44    |
| rs7912495   | <i>USP6NL</i>   | G             | 0.86                    | 0.44    | 1.01                | 0.91    | 0.93        | 0.41    |
| rs10437655  | <i>SPII</i>     | A             | 0.93                    | 0.68    | 1.13                | 0.27    | 0.91        | 0.25    |
| rs1582763   | <i>MS4A4A</i>   | A             | 1.17                    | 0.38    | 1.02                | 0.84    | 1.08        | 0.41    |
| rs3851179   | <i>EED</i>      | T             | 1.11                    | 0.57    | 0.98                | 0.84    | 1.10        | 0.28    |
| rs74685827  | <i>SORL1</i>    | G             | 5.55                    | 0.014   | 1.37                | 0.36    | 1.92        | 0.055   |
| rs11218343  | <i>SORL1</i>    | C             | 1.06                    | 0.88    | 0.56                | 0.053   | 1.11        | 0.67    |
| rs17125924  | <i>FERMT2</i>   | G             | 1.55                    | 0.18    | 0.93                | 0.71    | 1.03        | 0.83    |
| rs7401792   | <i>SLC24A4</i>  | G             | 1.02                    | 0.93    | 1.13                | 0.27    | 1.06        | 0.56    |
| rs12590654  | <i>SLC24A4</i>  | A             | 1.07                    | 0.71    | 1.12                | 0.30    | 1.17        | 0.080   |
| rs8025980   | <i>SPPL2A</i>   | G             | 1.20                    | 0.34    | 0.98 <sup>c</sup>   | 0.82    | 0.98        | 0.82    |
| rs602602    | <i>MINDY2</i>   | A             | -                       | -       | 1.08                | 0.53    | 1.01        | 0.90    |

|             |                 |   |      |       |                   |                      |      |       |
|-------------|-----------------|---|------|-------|-------------------|----------------------|------|-------|
| rs117618017 | <i>APH1B</i>    | T | 1.24 | 0.41  | 1.06              | 0.71                 | 1.15 | 0.26  |
| rs889555    | <i>BCKDK</i>    | T | 1.22 | 0.31  | 0.81              | 0.094                | 0.99 | 0.93  |
| rs4985556   | <i>IL34</i>     | A | 0.69 | 0.22  | 0.93              | 0.69                 | 1.05 | 0.72  |
| rs12446759  | <i>PLCG2</i>    | G | 0.83 | 0.33  | 0.97              | 0.77                 | 1.07 | 0.46  |
| rs72824905  | <i>PLCG2</i>    | G | 1.61 | 0.61  | -                 | -                    | -    | -     |
| rs7225151   | <i>SCIMP</i>    | A | 1.61 | 0.072 | 1.01              | 0.95                 | 1.11 | 0.45  |
| rs199515    | <i>WNT3</i>     | G | 0.91 | 0.68  | 0.74              | 0.031                | 0.90 | 0.32  |
| rs616338    | <i>ABI3</i>     | T | 1.10 | 0.95  | -                 | -                    | -    | -     |
| rs2526377   | <i>TSPOAP1</i>  | G | -    | -     | -                 | -                    | 0.98 | 0.78  |
| rs4277405   | <i>ACE</i>      | C | 0.86 | 0.43  | 0.78              | 0.026                | 1.07 | 0.43  |
| rs12151021  | <i>ABCA7</i>    | A | 1.25 | 0.24  | 1.34              | 0.010                | -    | -     |
| rs6014724   | <i>CASS4</i>    | G | 1.50 | 0.20  | 0.82              | 0.30                 | 1.35 | 0.061 |
| rs2830489   | <i>ADAMTS1</i>  | T | 0.79 | 0.26  | 0.91              | 0.42                 | 0.93 | 0.47  |
| rs141749679 | <i>SORT1</i>    | C | 1.34 | 0.81  | -                 | -                    | -    | -     |
| rs72777026  | <i>ADAM17</i>   | G | 0.88 | 0.60  | 1.06              | 0.71                 | 1.13 | 0.33  |
| rs17020490  | <i>PRKD3</i>    | C | 1.24 | 0.35  | 1.13              | 0.42                 | 1.07 | 0.57  |
| rs143080277 | <i>NCK2</i>     | C | -    | -     | -                 | -                    | -    | -     |
| rs139643391 | <i>WDR12</i>    | T | 1.03 | 0.92  | 1.06 <sup>d</sup> | 0.71                 | 1.02 | 0.89  |
| rs16824536  | <i>MME</i>      | A | 0.39 | 0.14  | 0.81              | 0.44                 | 1.15 | 0.50  |
| rs61762319  | <i>MME</i>      | G | 0.91 | 0.83  | 1.53              | 0.17                 | -    | -     |
| rs3822030   | <i>IDUA</i>     | G | -    | -     | -                 | -                    | -    | -     |
| rs2245466   | <i>RHOH</i>     | G | 1.13 | 0.52  | 1.05              | 0.66                 | 1.10 | 0.33  |
| rs112403360 | <i>ANKH</i>     | A | 0.98 | 0.94  | 0.88              | 0.52                 | 0.70 | 0.024 |
| rs62374257  | <i>COX7C</i>    | C | 0.84 | 0.44  | 1.11              | 0.39                 | 1.19 | 0.095 |
| rs871269    | <i>TNIP1</i>    | T | 0.86 | 0.41  | 0.80              | 0.055                | 0.99 | 0.93  |
| rs113706587 | <i>RASGEF1C</i> | A | 1.49 | 0.16  | 1.13              | 0.49                 | 0.97 | 0.82  |
| rs785129    | <i>HS3ST5</i>   | T | 0.99 | 0.98  | 0.83              | 0.099                | 1.02 | 0.79  |
| rs6943429   | <i>UMAD1</i>    | T | 0.90 | 0.58  | 1.17              | 0.17                 | -    | -     |
| rs10952097  | <i>ICA1</i>     | T | 1.26 | 0.37  | 0.85              | 0.40                 | -    | -     |
| rs13237518  | <i>TMEM106B</i> | A | 0.71 | 0.058 | 0.67              | $3.2 \times 10^{-4}$ | 0.88 | 0.15  |
| rs1160871   | <i>JAZF1</i>    | G | 0.65 | 0.064 | -                 | -                    | 0.85 | 0.11  |

|             |                         |   |      |       |      |                        |                   |        |
|-------------|-------------------------|---|------|-------|------|------------------------|-------------------|--------|
| rs76928645  | <i>SEC61G</i>           | T | 1.09 | 0.77  | 1.09 | 0.63                   | 1.02              | 0.89   |
| rs1065712   | <i>CTSB</i>             | C | -    | -     | 1.20 | 0.43                   | 1.24              | 0.26   |
| rs34173062  | <i>SHARPIN</i>          | A | -    | -     | 1.76 | 0.0029                 | -                 | -      |
| rs1800978   | <i>ABCA1</i>            | G | -    | -     | -    | -                      | 1.22              | 0.13   |
| rs7068231   | <i>ANK3</i>             | T | 1.19 | 0.37  | 0.92 | 0.42                   | 0.96              | 0.60   |
| rs6586028   | <i>TSPAN14</i>          | C | -    | -     | 0.94 | 0.66                   | 0.91              | 0.41   |
| rs6584063   | <i>BLNK</i>             | G | 1.13 | 0.78  | 1.23 | 0.47                   | 1.09 <sup>e</sup> | 0.70   |
| rs7908662   | <i>PLEKHA1</i>          | G | 0.88 | 0.45  | 0.97 | 0.79                   | -                 | -      |
| rs6489896   | <i>TPCN1</i>            | C | 1.72 | 0.094 | 1.05 | 0.84                   | 1.63              | 0.0069 |
| rs7157106   | <i>IGH</i> gene cluster | A | -    | -     | 1.02 | 0.90                   | -                 | -      |
| rs10131280  | <i>IGH</i> gene cluster | A | 1.26 | 0.34  | 0.74 | 0.075                  | 0.77              | 0.050  |
| rs3848143   | <i>SNX1</i>             | G | 1.50 | 0.054 | 0.97 | 0.81                   | 1.10              | 0.39   |
| rs12592898  | <i>CTSH</i>             | A | 1.08 | 0.77  | 1.06 | 0.73                   | 0.78              | 0.059  |
| rs1140239   | <i>DOC2A</i>            | T | 0.94 | 0.75  | 0.95 | 0.61                   | -                 | -      |
| rs450674    | <i>MAF</i>              | C | -    | -     | 0.91 | 0.40                   | 1.10              | 0.28   |
| rs16941239  | <i>FOXF1</i>            | A | 1.61 | 0.35  | 1.08 | 0.81                   | 1.42              | 0.22   |
| rs56407236  | <i>PRDM7</i>            | A | -    | -     | 0.45 | 9.3 × 10 <sup>-4</sup> | 1.14              | 0.42   |
| rs35048651  | <i>WDR81</i>            | T | 0.66 | 0.072 | -    | -                      | 0.85              | 0.12   |
| rs2242595   | <i>MYO15A</i>           | A | 1.30 | 0.36  | 1.23 | 0.23                   | 0.95              | 0.68   |
| rs5848      | <i>GRN</i>              | T | 1.12 | 0.56  | 1.11 | 0.37                   | 1.33              | 0.0035 |
| rs149080927 | <i>KLF16</i>            | G | 1.05 | 0.80  | -    | -                      | 0.97              | 0.70   |
| rs9304690   | <i>SIGLEC11</i>         | T | 0.75 | 0.22  | 1.07 | 0.62                   | 1.04              | 0.68   |
| rs587709    | <i>LILRB2</i>           | C | -    | -     | 1.02 | 0.85                   | -                 | -      |
| rs1358782   | <i>RBCK1</i>            | A | 1.01 | 0.98  | 1.06 | 0.63                   | 0.92              | 0.40   |
| rs6742      | <i>SLC2A4RG</i>         | T | 1.39 | 0.13  | 0.97 | 0.83                   | 1.19              | 0.099  |
| rs2154481   | <i>APP</i>              | C | -    | -     | 0.88 | 0.21                   | 1.07              | 0.45   |

<sup>a-d</sup> OR and P-value were computed by the proxy which was in perfect linkage disequilibrium block (i.e.,  $r^2 = 1$  and  $D' = 1$ )

<sup>a</sup> rs4351014, <sup>b</sup> rs6941385, <sup>c</sup> rs1291073, <sup>d</sup> rs6723704, <sup>e</sup> rs79663593

**Supplementary Table 8.** Association with Lewy bodies in any brain regions in people with European ancestry

| Variant     | Gene            | Effect allele | ADRC                    |         |                     |         | ROSMAP<br>(n = 1,266) |         |
|-------------|-----------------|---------------|-------------------------|---------|---------------------|---------|-----------------------|---------|
|             |                 |               | ADSP WGS<br>(n = 1,028) |         | ADGC<br>(n = 2,200) |         | OR                    | P-value |
|             |                 |               | OR                      | P-value | OR                  | P-value |                       |         |
| rs679515    | <i>CR1</i>      | T             | 1.05                    | 0.68    | 1.08                | 0.37    | 0.93                  | 0.56    |
| rs6733839   | <i>BINI</i>     | T             | 1.24                    | 0.023   | 1.13                | 0.054   | 1.16                  | 0.13    |
| rs10933431  | <i>INPP5D</i>   | G             | 1.03                    | 0.81    | 1.10                | 0.20    | 1.05                  | 0.67    |
| rs6846529   | <i>CLNK</i>     | C             | 0.97                    | 0.75    | 1.04 <sup>a</sup>   | 0.62    | 1.09                  | 0.43    |
| rs6605556   | <i>HLA-DQA1</i> | G             | 0.83 <sup>b</sup>       | 0.14    | 1.01                | 0.96    | 0.92                  | 0.56    |
| rs10947943  | <i>UNC5CL</i>   | A             | 1.16                    | 0.28    | 0.96                | 0.69    | 0.88                  | 0.35    |
| rs143332484 | <i>TREM2</i>    | T             | 1.95                    | 0.079   | -                   | -       | -                     | -       |
| rs75932628  | <i>TREM2</i>    | T             | 0.55                    | 0.17    | -                   | -       | -                     | -       |
| rs60755019  | <i>TREML2</i>   | G             | 2.02                    | 0.45    | -                   | -       | -                     | -       |
| rs7767350   | <i>CD2AP</i>    | T             | 1.04                    | 0.70    | 1.06                | 0.39    | 0.88                  | 0.25    |
| rs6966331   | <i>EPDR1</i>    | T             | 1.11                    | 0.32    | 0.99                | 0.89    | 1.24                  | 0.031   |
| rs7384878   | <i>SPDYE3</i>   | C             | 1.07                    | 0.51    | 0.98                | 0.79    | 1.02                  | 0.84    |
| rs11771145  | <i>EPHA1</i>    | A             | 0.97                    | 0.79    | 0.97                | 0.68    | 1.14                  | 0.18    |
| rs73223431  | <i>PTK2B</i>    | T             | 1.15                    | 0.15    | 0.94                | 0.34    | 1.03                  | 0.74    |
| rs11787077  | <i>CLU</i>      | T             | 0.88                    | 0.18    | 1.03                | 0.64    | 0.90                  | 0.27    |
| rs7912495   | <i>USP6NL</i>   | G             | 1.08                    | 0.45    | 1.12                | 0.069   | 1.26                  | 0.021   |
| rs10437655  | <i>SPII</i>     | A             | 1.06                    | 0.55    | 0.95                | 0.39    | 1.18                  | 0.077   |
| rs1582763   | <i>MS4A4A</i>   | A             | 0.92                    | 0.38    | 1.07                | 0.31    | 0.94                  | 0.55    |
| rs3851179   | <i>EED</i>      | T             | 0.97                    | 0.77    | 0.92                | 0.20    | 1.00                  | 0.99    |
| rs74685827  | <i>SORL1</i>    | G             | 1.43                    | 0.32    | 0.92                | 0.70    | 0.98                  | 0.95    |
| rs11218343  | <i>SORL1</i>    | C             | 1.07                    | 0.77    | 0.98                | 0.90    | 1.43                  | 0.15    |
| rs17125924  | <i>FERMT2</i>   | G             | 1.02                    | 0.88    | 0.96                | 0.74    | 1.00                  | 0.98    |
| rs7401792   | <i>SLC24A4</i>  | G             | 1.10                    | 0.32    | 1.00                | 0.97    | 0.85                  | 0.12    |
| rs12590654  | <i>SLC24A4</i>  | A             | 1.02                    | 0.89    | 0.96                | 0.60    | 0.96                  | 0.70    |
| rs8025980   | <i>SPPL2A</i>   | G             | 1.08                    | 0.46    | 1.00 <sup>c</sup>   | 1.00    | 1.06                  | 0.52    |
| rs602602    | <i>MINDY2</i>   | A             | -                       | -       | 1.14                | 0.057   | 1.16                  | 0.16    |



|             |                 |   |      |       |                   |       |      |       |
|-------------|-----------------|---|------|-------|-------------------|-------|------|-------|
| rs117618017 | <i>APH1B</i>    | T | 1.20 | 0.16  | 1.02              | 0.86  | 1.09 | 0.53  |
| rs889555    | <i>BCKDK</i>    | T | 0.96 | 0.73  | 1.05              | 0.47  | 0.82 | 0.061 |
| rs4985556   | <i>IL34</i>     | A | 0.98 | 0.87  | 1.23              | 0.031 | 1.08 | 0.59  |
| rs12446759  | <i>PLCG2</i>    | G | 0.92 | 0.38  | 0.89              | 0.091 | 1.14 | 0.19  |
| rs72824905  | <i>PLCG2</i>    | G | 1.46 | 0.49  | -                 | -     | -    | -     |
| rs7225151   | <i>SCIMP</i>    | A | 1.10 | 0.49  | 1.26              | 0.017 | 0.95 | 0.75  |
| rs199515    | <i>WNT3</i>     | G | 1.13 | 0.28  | 1.01              | 0.90  | 0.85 | 0.16  |
| rs616338    | <i>ABI3</i>     | T | 1.68 | 0.35  | -                 | -     | -    | -     |
| rs2526377   | <i>TSPOAP1</i>  | G | -    | -     | -                 | -     | 1.03 | 0.73  |
| rs4277405   | <i>ACE</i>      | C | 0.89 | 0.22  | 1.04              | 0.60  | 1.05 | 0.62  |
| rs12151021  | <i>ABCA7</i>    | A | 1.13 | 0.23  | 1.03              | 0.72  | -    | -     |
| rs6014724   | <i>CASS4</i>    | G | 0.92 | 0.65  | 0.85              | 0.16  | 1.27 | 0.15  |
| rs2830489   | <i>ADAMTS1</i>  | T | 1.12 | 0.30  | 1.04              | 0.63  | 0.84 | 0.10  |
| rs141749679 | <i>SORT1</i>    | C | 4.74 | 0.19  | -                 | -     | -    | -     |
| rs72777026  | <i>ADAM17</i>   | G | 1.10 | 0.48  | 1.07              | 0.47  | 1.30 | 0.050 |
| rs17020490  | <i>PRKD3</i>    | C | 1.14 | 0.29  | 0.97              | 0.71  | 0.90 | 0.44  |
| rs143080277 | <i>NCK2</i>     | C | 0.27 | 0.088 | -                 | -     | -    | -     |
| rs139643391 | <i>WDR12</i>    | T | 0.80 | 0.12  | 1.07 <sup>d</sup> | 0.47  | 1.22 | 0.15  |
| rs16824536  | <i>MME</i>      | A | 0.86 | 0.51  | 0.92              | 0.59  | 1.26 | 0.29  |
| rs61762319  | <i>MME</i>      | G | 1.05 | 0.87  | 0.92              | 0.71  | -    | -     |
| rs3822030   | <i>IDUA</i>     | G | -    | -     | -                 | -     | -    | -     |
| rs2245466   | <i>RHOH</i>     | G | 0.94 | 0.52  | 1.16              | 0.030 | 0.96 | 0.69  |
| rs112403360 | <i>ANKH</i>     | A | 1.06 | 0.72  | 1.06              | 0.62  | 0.82 | 0.27  |
| rs62374257  | <i>COX7C</i>    | C | 0.84 | 0.13  | 0.94              | 0.39  | 1.13 | 0.30  |
| rs871269    | <i>TNIP1</i>    | T | 0.83 | 0.066 | 1.07              | 0.33  | 1.02 | 0.87  |
| rs113706587 | <i>RASGEF1C</i> | A | 0.93 | 0.65  | 1.09              | 0.40  | 0.97 | 0.86  |
| rs785129    | <i>HS3ST5</i>   | T | 1.10 | 0.33  | 1.02              | 0.80  | 1.08 | 0.42  |
| rs6943429   | <i>UMAD1</i>    | T | 0.84 | 0.079 | 0.99              | 0.93  | -    | -     |
| rs10952097  | <i>ICA1</i>     | T | 0.83 | 0.22  | 0.82              | 0.074 | -    | -     |
| rs13237518  | <i>TMEM106B</i> | A | 1.15 | 0.16  | 1.08              | 0.25  | 1.17 | 0.10  |
| rs1160871   | <i>JAZF1</i>    | G | 1.06 | 0.59  | -                 | -     | 0.78 | 0.035 |

|             |                         |   |      |        |      |       |                   |       |
|-------------|-------------------------|---|------|--------|------|-------|-------------------|-------|
| rs76928645  | <i>SEC61G</i>           | T | 0.80 | 0.17   | 1.24 | 0.042 | 0.97              | 0.86  |
| rs1065712   | <i>CTSB</i>             | C | -    | -      | 0.94 | 0.67  | 1.32              | 0.16  |
| rs34173062  | <i>SHARPIN</i>          | A | -    | -      | 1.07 | 0.54  | -                 | -     |
| rs1800978   | <i>ABCA1</i>            | G | -    | -      | -    | -     | 0.89              | 0.42  |
| rs7068231   | <i>ANK3</i>             | T | 1.00 | 0.98   | 0.96 | 0.51  | 0.88              | 0.17  |
| rs6586028   | <i>TSPAN14</i>          | C | -    | -      | 1.05 | 0.53  | 0.88              | 0.31  |
| rs6584063   | <i>BLNK</i>             | G | 1.16 | 0.55   | 1.21 | 0.26  | 0.79 <sup>e</sup> | 0.33  |
| rs7908662   | <i>PLEKHA1</i>          | G | 0.96 | 0.67   | 0.93 | 0.25  | -                 | -     |
| rs6489896   | <i>TPCN1</i>            | C | 0.88 | 0.51   | 1.01 | 0.94  | 1.39              | 0.081 |
| rs7157106   | <i>IGH</i> gene cluster | A | -    | -      | 0.98 | 0.75  | -                 | -     |
| rs10131280  | <i>IGH</i> gene cluster | A | 0.96 | 0.77   | 0.83 | 0.058 | 1.05              | 0.72  |
| rs3848143   | <i>SNX1</i>             | G | 1.12 | 0.31   | 0.86 | 0.060 | 1.02              | 0.86  |
| rs12592898  | <i>CTSH</i>             | A | 0.96 | 0.76   | 1.00 | 0.98  | 0.85              | 0.27  |
| rs1140239   | <i>DOC2A</i>            | T | 0.94 | 0.54   | 0.98 | 0.77  | -                 | -     |
| rs450674    | <i>MAF</i>              | C | -    | -      | 0.85 | 0.019 | 1.15              | 0.16  |
| rs16941239  | <i>FOXF1</i>            | A | 1.08 | 0.78   | 1.09 | 0.68  | 0.78              | 0.46  |
| rs56407236  | <i>PRDM7</i>            | A | -    | -      | 1.12 | 0.37  | 0.96              | 0.84  |
| rs35048651  | <i>WDR81</i>            | T | 1.06 | 0.60   | -    | -     | 0.97              | 0.82  |
| rs2242595   | <i>MYO15A</i>           | A | 0.92 | 0.58   | 0.81 | 0.041 | 0.78              | 0.12  |
| rs5848      | <i>GRN</i>              | T | 1.18 | 0.11   | 0.96 | 0.54  | 0.98              | 0.85  |
| rs149080927 | <i>KLF16</i>            | G | 0.99 | 0.92   | -    | -     | 0.87              | 0.13  |
| rs9304690   | <i>SIGLEC11</i>         | T | 0.68 | 0.0013 | 1.00 | 0.96  | 1.27              | 0.022 |
| rs587709    | <i>LILRB2</i>           | C | -    | -      | 1.09 | 0.24  | -                 | -     |
| rs1358782   | <i>RBCK1</i>            | A | 1.24 | 0.042  | 0.96 | 0.55  | 0.94              | 0.56  |
| rs6742      | <i>SLC2A4RG</i>         | T | 0.98 | 0.89   | 1.03 | 0.73  | 1.02              | 0.89  |
| rs2154481   | <i>APP</i>              | C | -    | -      | 0.98 | 0.70  | 1.14              | 0.17  |

<sup>a-d</sup> OR and P-value were computed by the proxy which was in perfect linkage disequilibrium block (i.e.,  $r^2 = 1$  and  $D' = 1$ )

<sup>a</sup> rs4351014, <sup>b</sup> rs6941385, <sup>c</sup> rs1291073, <sup>d</sup> rs6723704, <sup>e</sup> rs79663593

**Supplementary Table 9.** Association with hippocampal sclerosis in people with European ancestry

| Variant     | Gene            | Effect allele | ADRC                    |         |                     |         | ROSMAP<br>(n = 1,266) |         |
|-------------|-----------------|---------------|-------------------------|---------|---------------------|---------|-----------------------|---------|
|             |                 |               | ADSP WGS<br>(n = 1,028) |         | ADGC<br>(n = 2,200) |         | OR                    | P-value |
|             |                 |               | OR                      | P-value | OR                  | P-value |                       |         |
| rs679515    | <i>CR1</i>      | T             | 0.86                    | 0.56    | 1.31                | 0.089   | 1.01                  | 0.97    |
| rs6733839   | <i>BIN1</i>     | T             | 0.87                    | 0.47    | 0.93                | 0.57    | 1.16                  | 0.33    |
| rs10933431  | <i>INPP5D</i>   | G             | 0.81                    | 0.40    | 0.77                | 0.094   | 1.04                  | 0.82    |
| rs6846529   | <i>CLNK</i>     | C             | 1.09                    | 0.67    | 0.90 <sup>a</sup>   | 0.46    | 1.08                  | 0.62    |
| rs6605556   | <i>HLA-DQA1</i> | G             | 0.68 <sup>b</sup>       | 0.19    | 0.87                | 0.44    | 0.79                  | 0.28    |
| rs10947943  | <i>UNC5CL</i>   | A             | 0.68                    | 0.20    | 0.73                | 0.12    | 1.34                  | 0.12    |
| rs143332484 | <i>TREM2</i>    | T             | 3.71                    | 0.037   | -                   | -       | -                     | -       |
| rs75932628  | <i>TREM2</i>    | T             | -                       | -       | -                   | -       | -                     | -       |
| rs60755019  | <i>TREML2</i>   | G             | -                       | -       | -                   | -       | -                     | -       |
| rs7767350   | <i>CD2AP</i>    | T             | 1.31                    | 0.21    | 0.93                | 0.59    | 0.88                  | 0.41    |
| rs6966331   | <i>EPDR1</i>    | T             | 0.68                    | 0.092   | 1.35                | 0.021   | 1.06                  | 0.69    |
| rs7384878   | <i>SPDYE3</i>   | C             | 0.98                    | 0.92    | 0.89                | 0.38    | 0.98                  | 0.89    |
| rs11771145  | <i>EPHA1</i>    | A             | 1.17                    | 0.44    | 1.02                | 0.89    | 1.08                  | 0.62    |
| rs73223431  | <i>PTK2B</i>    | T             | 1.31                    | 0.18    | 0.84                | 0.21    | 0.88                  | 0.39    |
| rs11787077  | <i>CLU</i>      | T             | 1.10                    | 0.64    | 1.19                | 0.17    | 0.80                  | 0.15    |
| rs7912495   | <i>USP6NL</i>   | G             | 0.93                    | 0.71    | 1.13                | 0.33    | 1.24                  | 0.15    |
| rs10437655  | <i>SPII</i>     | A             | 1.14                    | 0.53    | 1.14                | 0.30    | 0.78                  | 0.10    |
| rs1582763   | <i>MS4A4A</i>   | A             | 0.87                    | 0.50    | 1.12                | 0.41    | 0.86                  | 0.34    |
| rs3851179   | <i>EED</i>      | T             | 1.02                    | 0.91    | 0.98                | 0.86    | 1.00                  | 0.99    |
| rs74685827  | <i>SORL1</i>    | G             | 1.75                    | 0.40    | 1.63                | 0.18    | 2.06                  | 0.070   |
| rs11218343  | <i>SORL1</i>    | C             | 1.23                    | 0.61    | 0.75                | 0.44    | 0.70                  | 0.45    |
| rs17125924  | <i>FERMT2</i>   | G             | 1.27                    | 0.49    | 1.16                | 0.49    | 1.07                  | 0.79    |
| rs7401792   | <i>SLC24A4</i>  | G             | 0.81                    | 0.32    | 1.13                | 0.37    | 1.20                  | 0.24    |
| rs12590654  | <i>SLC24A4</i>  | A             | 1.10                    | 0.66    | 1.34                | 0.027   | 1.05                  | 0.73    |
| rs8025980   | <i>SPPL2A</i>   | G             | 1.04                    | 0.84    | 0.98 <sup>c</sup>   | 0.88    | 0.88                  | 0.40    |
| rs602602    | <i>MINDY2</i>   | A             | -                       | -       | 0.85                | 0.27    | 0.86                  | 0.36    |

|             |                 |   |      |        |                   |                      |      |        |
|-------------|-----------------|---|------|--------|-------------------|----------------------|------|--------|
| rs117618017 | <i>APH1B</i>    | T | 0.75 | 0.38   | 0.88              | 0.48                 | 1.05 | 0.84   |
| rs889555    | <i>BCKDK</i>    | T | 0.77 | 0.26   | 0.89              | 0.43                 | 0.91 | 0.56   |
| rs4985556   | <i>IL34</i>     | A | 1.59 | 0.096  | 0.61              | 0.027                | 0.82 | 0.40   |
| rs12446759  | <i>PLCG2</i>    | G | 0.68 | 0.072  | 1.03              | 0.81                 | 1.03 | 0.84   |
| rs72824905  | <i>PLCG2</i>    | G | -    | -      | -                 | -                    | -    | -      |
| rs7225151   | <i>SCIMP</i>    | A | 1.65 | 0.064  | 1.14              | 0.49                 | 1.54 | 0.035  |
| rs199515    | <i>WNT3</i>     | G | 0.71 | 0.20   | 0.66              | 0.018                | 0.71 | 0.075  |
| rs616338    | <i>ABI3</i>     | T | 1.43 | 0.75   | -                 | -                    | -    | -      |
| rs2526377   | <i>TSPOAP1</i>  | G | -    | -      | -                 | -                    | 0.99 | 0.92   |
| rs4277405   | <i>ACE</i>      | C | 0.98 | 0.90   | 1.24              | 0.095                | 1.44 | 0.013  |
| rs12151021  | <i>ABCA7</i>    | A | 1.16 | 0.48   | 1.05              | 0.71                 | -    | -      |
| rs6014724   | <i>CASS4</i>    | G | 0.92 | 0.83   | 1.40              | 0.087                | 0.87 | 0.61   |
| rs2830489   | <i>ADAMTS1</i>  | T | 0.54 | 0.015  | 0.94              | 0.66                 | 0.92 | 0.60   |
| rs141749679 | <i>SORT1</i>    | C | -    | -      | -                 | -                    | -    | -      |
| rs72777026  | <i>ADAM17</i>   | G | 0.81 | 0.46   | 1.04              | 0.85                 | 0.87 | 0.52   |
| rs17020490  | <i>PRKD3</i>    | C | 0.82 | 0.50   | 1.22              | 0.26                 | 1.21 | 0.35   |
| rs143080277 | <i>NCK2</i>     | C | 1.78 | 0.61   | -                 | -                    | -    | -      |
| rs139643391 | <i>WDR12</i>    | T | 1.06 | 0.83   | 0.62 <sup>d</sup> | 0.035                | 0.77 | 0.27   |
| rs16824536  | <i>MME</i>      | A | 0.40 | 0.22   | 0.59              | 0.15                 | 1.49 | 0.19   |
| rs61762319  | <i>MME</i>      | G | 1.56 | 0.34   | 1.31              | 0.47                 | -    | -      |
| rs3822030   | <i>IDUA</i>     | G | -    | -      | -                 | -                    | -    | -      |
| rs2245466   | <i>RHOH</i>     | G | 1.52 | 0.038  | 0.88              | 0.35                 | 0.86 | 0.35   |
| rs112403360 | <i>ANKH</i>     | A | 1.02 | 0.95   | 0.71              | 0.21                 | 0.99 | 0.96   |
| rs62374257  | <i>COX7C</i>    | C | 1.03 | 0.91   | 0.85              | 0.27                 | 0.93 | 0.67   |
| rs871269    | <i>TNIP1</i>    | T | 0.79 | 0.27   | 0.82              | 0.15                 | 0.64 | 0.0073 |
| rs113706587 | <i>RASGEF1C</i> | A | 0.97 | 0.93   | 1.48              | 0.042                | 0.92 | 0.74   |
| rs785129    | <i>HS3ST5</i>   | T | 0.91 | 0.65   | 1.10              | 0.46                 | 1.27 | 0.10   |
| rs6943429   | <i>UMAD1</i>    | T | 0.99 | 0.95   | 0.94              | 0.62                 | -    | -      |
| rs10952097  | <i>ICA1</i>     | T | 1.44 | 0.18   | 0.93              | 0.74                 | -    | -      |
| rs13237518  | <i>TMEM106B</i> | A | 0.51 | 0.0019 | 0.64              | $8.5 \times 10^{-4}$ | 0.71 | 0.021  |
| rs1160871   | <i>JAZF1</i>    | G | 0.56 | 0.033  | -                 | -                    | 0.83 | 0.29   |

|             |                         |   |      |        |      |        |                   |        |
|-------------|-------------------------|---|------|--------|------|--------|-------------------|--------|
| rs76928645  | <i>SEC61G</i>           | T | 0.96 | 0.91   | 1.19 | 0.39   | 0.72              | 0.21   |
| rs1065712   | <i>CTSB</i>             | C | -    | -      | 1.01 | 0.97   | 1.17              | 0.60   |
| rs34173062  | <i>SHARPIN</i>          | A | -    | -      | 0.95 | 0.81   | -                 | -      |
| rs1800978   | <i>ABCA1</i>            | G | -    | -      | -    | -      | 1.41              | 0.097  |
| rs7068231   | <i>ANK3</i>             | T | 1.02 | 0.91   | 0.91 | 0.46   | 0.96              | 0.80   |
| rs6586028   | <i>TSPAN14</i>          | C | -    | -      | 1.19 | 0.27   | 1.15              | 0.44   |
| rs6584063   | <i>BLNK</i>             | G | 1.02 | 0.97   | 1.06 | 0.85   | 0.71 <sup>e</sup> | 0.35   |
| rs7908662   | <i>PLEKHA1</i>          | G | 0.89 | 0.54   | 1.42 | 0.0052 | -                 | -      |
| rs6489896   | <i>TPCN1</i>            | C | 1.01 | 0.99   | 1.33 | 0.24   | 1.14              | 0.66   |
| rs7157106   | <i>IGH</i> gene cluster | A | -    | -      | 1.11 | 0.42   | -                 | -      |
| rs10131280  | <i>IGH</i> gene cluster | A | 0.65 | 0.19   | 0.86 | 0.43   | 0.88              | 0.59   |
| rs3848143   | <i>SNX1</i>             | G | 1.39 | 0.14   | 1.00 | 0.97   | 1.05              | 0.78   |
| rs12592898  | <i>CTSH</i>             | A | 1.27 | 0.39   | 1.10 | 0.60   | 0.83              | 0.44   |
| rs1140239   | <i>DOC2A</i>            | T | 0.79 | 0.25   | 1.17 | 0.21   | -                 | -      |
| rs450674    | <i>MAF</i>              | C | -    | -      | 0.79 | 0.083  | 1.08              | 0.62   |
| rs16941239  | <i>FOXF1</i>            | A | 1.87 | 0.20   | 1.10 | 0.79   | 1.22              | 0.63   |
| rs56407236  | <i>PRDM7</i>            | A | -    | -      | 1.01 | 0.96   | 0.69              | 0.27   |
| rs35048651  | <i>WDR81</i>            | T | 0.95 | 0.82   | -    | -      | 1.01              | 0.94   |
| rs2242595   | <i>MYO15A</i>           | A | 1.33 | 0.32   | 1.07 | 0.73   | 0.84              | 0.45   |
| rs5848      | <i>GRN</i>              | T | 1.75 | 0.0072 | 1.40 | 0.012  | 1.61              | 0.0019 |
| rs149080927 | <i>KLF16</i>            | G | 0.95 | 0.80   | -    | -      | 1.07              | 0.64   |
| rs9304690   | <i>SIGLEC11</i>         | T | 0.87 | 0.58   | 0.92 | 0.57   | 0.87              | 0.42   |
| rs587709    | <i>LILRB2</i>           | C | -    | -      | 1.11 | 0.46   | -                 | -      |
| rs1358782   | <i>RBCK1</i>            | A | 0.71 | 0.14   | 1.08 | 0.61   | 0.86              | 0.37   |
| rs6742      | <i>SLC2A4RG</i>         | T | 1.05 | 0.84   | 1.05 | 0.73   | 1.02              | 0.90   |
| rs2154481   | <i>APP</i>              | C | -    | -      | 0.99 | 0.95   | 1.01              | 0.97   |

<sup>a-d</sup> OR and P-value were computed by the proxy which was in perfect linkage disequilibrium block (i.e.,  $r^2 = 1$  and  $D' = 1$ )

<sup>a</sup> rs4351014, <sup>b</sup> rs6941385, <sup>c</sup> rs1291073, <sup>d</sup> rs6723704, <sup>e</sup> rs79663593

**Supplementary Table 10.** Association results from meta-analysis in people with European ancestry

| Variant     | Gene            | Braak NFT stage |                      | Neocortical<br>neuritic plaques |                      | TDP-43 in any<br>brain regions |         | Lewy bodies in<br>any brain regions |         | Hippocampal<br>sclerosis |         |
|-------------|-----------------|-----------------|----------------------|---------------------------------|----------------------|--------------------------------|---------|-------------------------------------|---------|--------------------------|---------|
|             |                 | OR              | P-value              | OR                              | P-value              | OR                             | P-value | OR                                  | P-value | OR                       | P-value |
| rs679515    | <i>CRI</i>      | 1.24            | $3.8 \times 10^{-4}$ | 1.15                            | 0.020                | 1.19                           | 0.041   | 1.03                                | 0.60    | 1.11                     | 0.39    |
| rs6733839   | <i>BIN1</i>     | 1.30            | $2.6 \times 10^{-8}$ | 1.21                            | $3.9 \times 10^{-5}$ | 1.05                           | 0.41    | 1.16                                | 0.0012  | 0.99                     | 1.00    |
| rs10933431  | <i>INPP5D</i>   | 0.86            | 0.0094               | 0.88                            | 0.021                | 0.90                           | 0.20    | 1.07                                | 0.22    | 0.87                     | 0.21    |
| rs6846529   | <i>CLNK</i>     | 1.11            | 0.17                 | 1.03                            | 0.73                 | 1.14                           | 0.13    | 1.02                                | 0.72    | 1.09                     | 0.52    |
| rs6605556   | <i>HLA-DQA1</i> | 0.89            | 0.086                | 0.90                            | 0.13                 | 0.98                           | 0.85    | 0.98                                | 0.76    | 0.81                     | 0.082   |
| rs10947943  | <i>UNC5CL</i>   | 0.89            | 0.087                | 0.87                            | 0.046                | 0.92                           | 0.30    | 0.99                                | 0.80    | 0.95                     | 0.64    |
| rs7767350   | <i>CD2AP</i>    | 1.11            | 0.046                | 1.06                            | 0.25                 | 1.01                           | 0.84    | 1.01                                | 0.85    | 0.97                     | 0.72    |
| rs6966331   | <i>EPDR1</i>    | 0.95            | 0.28                 | 1.00                            | 0.97                 | 1.03                           | 0.65    | 1.07                                | 0.13    | 1.11                     | 0.31    |
| rs7384878   | <i>SPDYE3</i>   | 0.88            | 0.013                | 0.88                            | 0.015                | 1.00                           | 0.97    | 1.01                                | 0.81    | 0.94                     | 0.50    |
| rs11771145  | <i>EPHA1</i>    | 0.92            | 0.11                 | 0.97                            | 0.59                 | 1.00                           | 0.98    | 1.01                                | 0.79    | 1.07                     | 0.46    |
| rs73223431  | <i>PTK2B</i>    | 1.11            | 0.030                | 1.13                            | 0.0088               | 1.03                           | 0.74    | 1.01                                | 0.84    | 0.93                     | 0.42    |
| rs11787077  | <i>CLU</i>      | 0.94            | 0.21                 | 0.99                            | 0.84                 | 1.04                           | 0.58    | 0.96                                | 0.37    | 1.03                     | 0.91    |
| rs7912495   | <i>USP6NL</i>   | 1.06            | 0.21                 | 0.98                            | 0.67                 | 0.95                           | 0.41    | 1.14                                | 0.0043  | 1.13                     | 0.15    |
| rs10437655  | <i>SPI1</i>     | 1.13            | 0.0064               | 1.07                            | 0.15                 | 0.98                           | 0.74    | 1.03                                | 0.54    | 1.00                     | 0.86    |
| rs1582763   | <i>MS4A4A</i>   | 0.94            | 0.22                 | 0.91                            | 0.048                | 1.07                           | 0.30    | 1.00                                | 0.99    | 0.97                     | 0.70    |
| rs3851179   | <i>EED</i>      | 0.88            | 0.0089               | 0.85                            | 1.0E-03              | 1.06                           | 0.39    | 0.95                                | 0.30    | 1.00                     | 0.96    |
| rs74685827  | <i>SORL1</i>    | 1.13            | 0.45                 | 1.15                            | 0.37                 | 1.85                           | 0.0042  | 1.02                                | 0.86    | 1.81                     | 0.017   |
| rs11218343  | <i>SORL1</i>    | 0.86            | 0.21                 | 1.05                            | 0.70                 | 0.89                           | 0.44    | 1.10                                | 0.42    | 0.87                     | 0.44    |
| rs17125924  | <i>FERMT2</i>   | 1.13            | 0.15                 | 1.25                            | 0.0047               | 1.04                           | 0.64    | 0.99                                | 0.88    | 1.14                     | 0.37    |
| rs7401792   | <i>SLC24A4</i>  | 1.10            | 0.057                | 1.01                            | 0.83                 | 1.08                           | 0.27    | 0.99                                | 0.71    | 1.08                     | 0.36    |
| rs12590654  | <i>SLC24A4</i>  | 0.94            | 0.22                 | 1.01                            | 0.89                 | 1.14                           | 0.047   | 0.98                                | 0.61    | 1.18                     | 0.072   |
| rs8025980   | <i>SPPL2A</i>   | 1.13            | 0.072                | 1.14                            | 0.053                | 1.02                           | 0.79    | 1.07                                | 0.33    | 0.93                     | 0.54    |
| rs117618017 | <i>APH1B</i>    | 1.17            | 0.022                | 1.23                            | 0.0020               | 1.13                           | 0.18    | 1.08                                | 0.26    | 0.91                     | 0.50    |
| rs889555    | <i>BCKDK</i>    | 0.96            | 0.44                 | 1.01                            | 0.89                 | 0.95                           | 0.52    | 0.97                                | 0.52    | 0.88                     | 0.18    |
| rs4985556   | <i>IL34</i>     | 1.02            | 0.81                 | 0.92                            | 0.25                 | 0.96                           | 0.64    | 1.14                                | 0.086   | 0.86                     | 0.21    |
| rs12446759  | <i>PLCG2</i>    | 0.92            | 0.084                | 0.96                            | 0.33                 | 1.00                           | 0.97    | 0.95                                | 0.35    | 0.96                     | 0.65    |
| rs7225151   | <i>SCIMP</i>    | 1.08            | 0.31                 | 1.06                            | 0.39                 | 1.13                           | 0.20    | 1.15                                | 0.066   | 1.36                     | 0.0095  |

|             |                         |      |                      |      |        |      |                      |      |       |      |                      |
|-------------|-------------------------|------|----------------------|------|--------|------|----------------------|------|-------|------|----------------------|
| rs199515    | <i>WNT3</i>             | 0.95 | 0.40                 | 0.99 | 0.90   | 0.85 | 0.033                | 1.00 | 0.90  | 0.69 | 0.0014               |
| rs4277405   | <i>ACE</i>              | 1.07 | 0.13                 | 0.98 | 0.69   | 0.94 | 0.29                 | 1.00 | 0.97  | 1.25 | 0.0082               |
| rs6014724   | <i>CASS4</i>            | 0.96 | 0.71                 | 0.87 | 0.11   | 1.15 | 0.22                 | 0.96 | 0.65  | 1.14 | 0.52                 |
| rs2830489   | <i>ADAMTS1</i>          | 0.99 | 0.86                 | 1.02 | 0.73   | 0.91 | 0.15                 | 1.00 | 0.99  | 0.86 | 0.10                 |
| rs72777026  | <i>ADAM17</i>           | 1.07 | 0.29                 | 1.17 | 0.015  | 1.07 | 0.48                 | 1.13 | 0.062 | 0.93 | 0.54                 |
| rs17020490  | <i>PRKD3</i>            | 0.98 | 0.78                 | 1.01 | 0.93   | 1.12 | 0.21                 | 0.99 | 0.87  | 1.13 | 0.30                 |
| rs139643391 | <i>WDR12</i>            | 0.92 | 0.40                 | 0.96 | 0.64   | 1.02 | 0.87                 | 1.00 | 1.00  | 0.88 | 0.41                 |
| rs16824536  | <i>MME</i>              | 0.70 | $9.8 \times 10^{-4}$ | 0.70 | 0.0011 | 0.95 | 0.57                 | 0.98 | 0.88  | 0.94 | 0.58                 |
| rs2245466   | <i>RHOH</i>             | 0.99 | 0.90                 | 1.01 | 0.90   | 1.08 | 0.23                 | 1.05 | 0.32  | 0.98 | 0.72                 |
| rs112403360 | <i>ANKH</i>             | 1.16 | 0.081                | 1.11 | 0.24   | 0.79 | 0.045                | 1.00 | 0.96  | 0.87 | 0.42                 |
| rs62374257  | <i>COX7C</i>            | 1.20 | 0.0011               | 1.05 | 0.34   | 1.12 | 0.17                 | 0.95 | 0.42  | 0.91 | 0.35                 |
| rs871269    | <i>TNIP1</i>            | 0.96 | 0.40                 | 0.99 | 0.87   | 0.91 | 0.13                 | 0.99 | 0.91  | 0.75 | 0.0018               |
| rs113706587 | <i>RASGEF1C</i>         | 1.09 | 0.25                 | 1.04 | 0.66   | 1.08 | 0.43                 | 1.02 | 0.78  | 1.18 | 0.31                 |
| rs785129    | <i>HS3ST5</i>           | 1.01 | 0.83                 | 0.94 | 0.17   | 0.95 | 0.43                 | 1.05 | 0.28  | 1.13 | 0.17                 |
| rs13237518  | <i>TMEM106B</i>         | 1.12 | 0.013                | 0.99 | 0.84   | 0.78 | $1.0 \times 10^{-4}$ | 1.11 | 0.019 | 0.64 | $9.3 \times 10^{-7}$ |
| rs76928645  | <i>SEC61G</i>           | 0.99 | 0.94                 | 1.00 | 0.96   | 1.05 | 0.62                 | 1.06 | 0.50  | 0.98 | 0.73                 |
| rs7068231   | <i>ANK3</i>             | 0.96 | 0.37                 | 1.02 | 0.71   | 0.97 | 0.63                 | 0.95 | 0.24  | 0.95 | 0.55                 |
| rs6584063   | <i>BLNK</i>             | 1.11 | 0.37                 | 0.95 | 0.74   | 1.13 | 0.42                 | 1.08 | 0.57  | 0.91 | 0.62                 |
| rs6489896   | <i>TPCN1</i>            | 1.12 | 0.21                 | 1.08 | 0.44   | 1.42 | 0.0071               | 1.06 | 0.51  | 1.20 | 0.30                 |
| rs10131280  | <i>IGH</i> gene cluster | 0.96 | 0.58                 | 1.00 | 0.96   | 0.82 | 0.041                | 0.91 | 0.20  | 0.82 | 0.16                 |
| rs3848143   | <i>SNX1</i>             | 1.06 | 0.25                 | 1.14 | 0.021  | 1.10 | 0.22                 | 0.96 | 0.46  | 1.09 | 0.44                 |
| rs12592898  | <i>CTSH</i>             | 0.89 | 0.079                | 0.91 | 0.16   | 0.91 | 0.31                 | 0.95 | 0.46  | 1.05 | 0.87                 |
| rs16941239  | <i>FOXF1</i>            | 0.98 | 0.87                 | 0.92 | 0.54   | 1.31 | 0.17                 | 1.02 | 0.97  | 1.29 | 0.31                 |
| rs2242595   | <i>MYO15A</i>           | 0.85 | 0.032                | 0.90 | 0.14   | 1.07 | 0.44                 | 0.83 | 0.012 | 1.04 | 0.90                 |
| rs5848      | <i>GRN</i>              | 0.95 | 0.31                 | 0.97 | 0.56   | 1.22 | 0.0049               | 1.01 | 0.80  | 1.53 | $2.1 \times 10^{-6}$ |
| rs9304690   | <i>SIGLEC11</i>         | 0.98 | 0.76                 | 0.99 | 0.83   | 1.02 | 0.92                 | 0.98 | 0.69  | 0.89 | 0.26                 |
| rs1358782   | <i>RBCK1</i>            | 0.88 | 0.021                | 0.85 | 0.0023 | 0.98 | 0.76                 | 1.02 | 0.80  | 0.92 | 0.38                 |
| rs6742      | <i>SLC2A4RG</i>         | 1.04 | 0.51                 | 1.04 | 0.47   | 1.13 | 0.099                | 1.01 | 0.80  | 1.04 | 0.70                 |

NFT = neurofibrillary tangle; TDP-43 = TAR DNA binding protein 43 kDa

**Supplementary Table 11.** Association with Braak neurofibrillary tangle stage in people with other ancestries

| Variant     | Gene            | Effect allele | ADRC                  |         |                   |         |
|-------------|-----------------|---------------|-----------------------|---------|-------------------|---------|
|             |                 |               | ADSP WGS<br>(n = 140) |         | ADGC<br>(n = 134) |         |
|             |                 |               | OR                    | P-value | OR                | P-value |
| rs679515    | <i>CRI</i>      | T             | 1.23                  | 0.73    | 0.66              | 0.43    |
| rs6733839   | <i>BINI</i>     | T             | 1.52                  | 0.15    | 1.47              | 0.17    |
| rs10933431  | <i>INPP5D</i>   | G             | 0.74                  | 0.26    | 1.38              | 0.24    |
| rs6846529   | <i>CLNK</i>     | C             | 0.48                  | 0.0066  | -                 | -       |
| rs6605556   | <i>HLA-DQA1</i> | G             | -                     | -       | 0.56              | 0.12    |
| rs10947943  | <i>UNC5CL</i>   | A             | 1.61                  | 0.53    | 0.82              | 0.63    |
| rs143332484 | <i>TREM2</i>    | T             | -                     | -       | -                 | -       |
| rs75932628  | <i>TREM2</i>    | T             | -                     | -       | -                 | -       |
| rs60755019  | <i>TREML2</i>   | G             | 1.08                  | 0.82    | 1.14              | 0.80    |
| rs7767350   | <i>CD2AP</i>    | T             | 1.72                  | 0.12    | 1.03              | 0.92    |
| rs6966331   | <i>EPDR1</i>    | T             | 1.15                  | 0.63    | 0.71              | 0.25    |
| rs7384878   | <i>SPDYE3</i>   | C             | 1.26                  | 0.55    | 0.67              | 0.22    |
| rs11771145  | <i>EPHA1</i>    | A             | 0.85                  | 0.53    | 1.11              | 0.69    |
| rs73223431  | <i>PTK2B</i>    | T             | 0.90                  | 0.72    | 1.37              | 0.26    |
| rs11787077  | <i>CLU</i>      | T             | 1.11                  | 0.69    | 1.02              | 0.95    |
| rs7912495   | <i>USP6NL</i>   | G             | 1.45                  | 0.20    | 1.50              | 0.13    |
| rs10437655  | <i>SPI1</i>     | A             | 1.09                  | 0.77    | 1.14              | 0.64    |
| rs1582763   | <i>MS4A4A</i>   | A             | 1.57                  | 0.30    | 1.00              | 1.00    |
| rs3851179   | <i>EED</i>      | T             | 0.73                  | 0.36    | 1.67              | 0.099   |
| rs74685827  | <i>SORL1</i>    | G             | 1.80                  | 0.62    | 2.13              | 0.59    |
| rs11218343  | <i>SORL1</i>    | C             | 1.19                  | 0.74    | 0.74              | 0.57    |
| rs17125924  | <i>FERMT2</i>   | G             | 0.99                  | 0.99    | 0.82              | 0.66    |
| rs7401792   | <i>SLC24A4</i>  | G             | 0.63                  | 0.15    | 1.10              | 0.74    |
| rs12590654  | <i>SLC24A4</i>  | A             | 1.08                  | 0.80    | 0.74              | 0.30    |
| rs8025980   | <i>SPPL2A</i>   | G             | 1.71                  | 0.058   | -                 | -       |
| rs602602    | <i>MINDY2</i>   | A             | -                     | -       | 1.81              | 0.037   |
| rs117618017 | <i>APH1B</i>    | T             | 1.63                  | 0.57    | 2.22              | 0.16    |
| rs889555    | <i>BCKDK</i>    | T             | 0.91                  | 0.72    | 1.23              | 0.47    |
| rs4985556   | <i>IL34</i>     | A             | 0.58                  | 0.38    | 0.91              | 0.87    |
| rs12446759  | <i>PLCG2</i>    | G             | 0.92                  | 0.79    | 1.38              | 0.25    |
| rs72824905  | <i>PLCG2</i>    | G             | -                     | -       | -                 | -       |
| rs7225151   | <i>SCIMP</i>    | A             | 0.86                  | 0.67    | 0.44              | 0.057   |
| rs199515    | <i>WNT3</i>     | G             | 0.97                  | 0.93    | 1.21              | 0.66    |
| rs616338    | <i>ABI3</i>     | T             | -                     | -       | -                 | -       |
| rs2526377   | <i>TSPOAP1</i>  | G             | -                     | -       | -                 | -       |
| rs4277405   | <i>ACE</i>      | C             | 1.39                  | 0.23    | 0.57              | 0.065   |
| rs12151021  | <i>ABCA7</i>    | A             | 1.88                  | 0.024   | 1.52              | 0.13    |
| rs6014724   | <i>CASS4</i>    | G             | 1.21                  | 0.69    | 0.91              | 0.79    |
| rs2830489   | <i>ADAMTS1</i>  | T             | 1.32                  | 0.59    | 0.85              | 0.70    |
| rs141749679 | <i>SORT1</i>    | C             | -                     | -       | -                 | -       |



|             |                         |   |      |       |      |                   |
|-------------|-------------------------|---|------|-------|------|-------------------|
| rs72777026  | <i>ADAM17</i>           | G | 1.46 | 0.22  | 0.98 | 0.95              |
| rs17020490  | <i>PRKD3</i>            | C | 1.47 | 0.28  | 0.97 | 0.93              |
| rs143080277 | <i>NCK2</i>             | C | 0.65 | 0.77  | -    | -                 |
| rs139643391 | <i>WDR12</i>            | T | 3.31 | 0.17  | 1.08 | 0.92 <sup>a</sup> |
| rs16824536  | <i>MME</i>              | A | 0.48 | 0.014 | 0.71 | 0.43              |
| rs61762319  | <i>MME</i>              | G | 0.65 | 0.77  | -    | -                 |
| rs3822030   | <i>IDUA</i>             | G | -    | -     | -    | -                 |
| rs2245466   | <i>RHOH</i>             | G | 1.43 | 0.27  | 1.57 | 0.11              |
| rs112403360 | <i>ANKH</i>             | A | 2.03 | 0.20  | 2.08 | 0.21              |
| rs62374257  | <i>COX7C</i>            | C | 1.17 | 0.77  | 1.59 | 0.17              |
| rs871269    | <i>TNIP1</i>            | T | 0.70 | 0.22  | 0.81 | 0.45              |
| rs113706587 | <i>RASGEF1C</i>         | A | 1.68 | 0.41  | 0.95 | 0.92              |
| rs785129    | <i>HS3ST5</i>           | T | 0.95 | 0.87  | 0.64 | 0.11              |
| rs6943429   | <i>UMAD1</i>            | T | 1.08 | 0.79  | 1.16 | 0.55              |
| rs10952097  | <i>ICAI</i>             | T | 1.86 | 0.050 | 0.93 | 0.81              |
| rs13237518  | <i>TMEM106B</i>         | A | 1.28 | 0.38  | 0.89 | 0.67              |
| rs1160871   | <i>JAZF1</i>            | G | 0.59 | 0.092 | -    | -                 |
| rs76928645  | <i>SEC61G</i>           | T | 1.93 | 0.60  | 1.09 | 0.88              |
| rs1065712   | <i>CTSB</i>             | C | -    | -     | -    | -                 |
| rs34173062  | <i>SHARPIN</i>          | A | -    | -     | 0.44 | 0.29              |
| rs1800978   | <i>ABCA1</i>            | G | -    | -     | -    | -                 |
| rs7068231   | <i>ANK3</i>             | T | 0.69 | 0.23  | 0.75 | 0.29              |
| rs6586028   | <i>TSPAN14</i>          | C | -    | -     | 0.39 | 0.055             |
| rs6584063   | <i>BLNK</i>             | G | 1.45 | 0.66  | 0.73 | 0.61              |
| rs7908662   | <i>PLEKHA1</i>          | G | 0.57 | 0.050 | 1.06 | 0.82              |
| rs6489896   | <i>TPCN1</i>            | C | 0.71 | 0.33  | 1.25 | 0.54              |
| rs7157106   | <i>IGH</i> gene cluster | A | -    | -     | 1.42 | 0.24              |
| rs10131280  | <i>IGH</i> gene cluster | A | 1.04 | 0.92  | 1.14 | 0.73              |
| rs3848143   | <i>SNX1</i>             | G | 0.99 | 0.97  | 1.61 | 0.10              |
| rs12592898  | <i>CTSH</i>             | A | 0.53 | 0.041 | 0.84 | 0.69              |
| rs1140239   | <i>DOC2A</i>            | T | 1.00 | 0.99  | 1.23 | 0.47              |
| rs450674    | <i>MAF</i>              | C | -    | -     | 0.84 | 0.59              |
| rs16941239  | <i>FOXF1</i>            | A | 0.62 | 0.16  | 1.17 | 0.70              |
| rs56407236  | <i>PRDM7</i>            | A | -    | -     | 1.90 | 0.34              |
| rs35048651  | <i>WDR81</i>            | T | 1.70 | 0.19  | -    | -                 |
| rs2242595   | <i>MYO15A</i>           | A | 0.73 | 0.42  | 0.90 | 0.76              |
| rs5848      | <i>GRN</i>              | T | 0.85 | 0.60  | 1.57 | 0.16              |
| rs149080927 | <i>KLF16</i>            | G | 0.59 | 0.18  | -    | -                 |
| rs9304690   | <i>SIGLEC11</i>         | T | 0.87 | 0.70  | 2.13 | 0.036             |
| rs587709    | <i>LILRB2</i>           | C | -    | -     | 0.95 | 0.86              |
| rs1358782   | <i>RBCK1</i>            | A | 0.75 | 0.40  | 0.44 | 0.023             |
| rs6742      | <i>SLC2A4RG</i>         | T | 1.12 | 0.73  | 0.85 | 0.63              |
| rs2154481   | <i>APP</i>              | C | -    | -     | 1.23 | 0.51              |

<sup>a</sup> OR and P-value were computed by the proxy (rs72934704) which was in perfect linkage disequilibrium block (i.e.,  $r^2 = 1$  and  $D' = 1$ )

**Supplementary Table 12.** Association with neocortical neuritic plaques in people with other ancestries

| Variant     | Gene            | Effect allele | ADRC                  |         |                   |         |
|-------------|-----------------|---------------|-----------------------|---------|-------------------|---------|
|             |                 |               | ADSP WGS<br>(n = 140) |         | ADGC<br>(n = 134) |         |
|             |                 |               | OR                    | P-value | OR                | P-value |
| rs679515    | <i>CR1</i>      | T             | 0.56                  | 0.29    | 0.52              | 0.23    |
| rs6733839   | <i>BIN1</i>     | T             | 1.72                  | 0.059   | 1.77              | 0.048   |
| rs10933431  | <i>INPP5D</i>   | G             | 0.67                  | 0.13    | 1.44              | 0.21    |
| rs6846529   | <i>CLNK</i>     | C             | 0.64                  | 0.091   | -                 | -       |
| rs6605556   | <i>HLA-DQA1</i> | G             | -                     | -       | 1.00              | 0.99    |
| rs10947943  | <i>UNC5CL</i>   | A             | 0.75                  | 0.67    | 1.23              | 0.62    |
| rs143332484 | <i>TREM2</i>    | T             | -                     | -       | -                 | -       |
| rs75932628  | <i>TREM2</i>    | T             | -                     | -       | -                 | -       |
| rs60755019  | <i>TREML2</i>   | G             | 0.99                  | 0.98    | 0.73              | 0.56    |
| rs7767350   | <i>CD2AP</i>    | T             | 1.22                  | 0.54    | 1.31              | 0.39    |
| rs6966331   | <i>EPDR1</i>    | T             | 1.05                  | 0.87    | 0.90              | 0.73    |
| rs7384878   | <i>SPDYE3</i>   | C             | 1.45                  | 0.35    | 0.90              | 0.76    |
| rs11771145  | <i>EPHA1</i>    | A             | 1.08                  | 0.77    | 1.25              | 0.40    |
| rs73223431  | <i>PTK2B</i>    | T             | 1.13                  | 0.68    | 1.89              | 0.033   |
| rs11787077  | <i>CLU</i>      | T             | 1.09                  | 0.74    | 0.81              | 0.48    |
| rs7912495   | <i>USP6NL</i>   | G             | 1.29                  | 0.37    | 1.46              | 0.16    |
| rs10437655  | <i>SPI1</i>     | A             | 0.91                  | 0.75    | 1.08              | 0.80    |
| rs1582763   | <i>MS4A4A</i>   | A             | 1.38                  | 0.44    | 1.38              | 0.41    |
| rs3851179   | <i>EED</i>      | T             | 0.69                  | 0.28    | 1.50              | 0.19    |
| rs74685827  | <i>SORL1</i>    | G             | 2.30                  | 0.49    | 3.27              | 0.43    |
| rs11218343  | <i>SORL1</i>    | C             | 1.02                  | 0.98    | 0.27              | 0.047   |
| rs17125924  | <i>FERMT2</i>   | G             | 1.23                  | 0.71    | 1.54              | 0.36    |
| rs7401792   | <i>SLC24A4</i>  | G             | 0.79                  | 0.41    | 1.32              | 0.35    |
| rs12590654  | <i>SLC24A4</i>  | A             | 1.28                  | 0.38    | 0.75              | 0.32    |
| rs8025980   | <i>SPPL2A</i>   | G             | 1.05                  | 0.84    | -                 | -       |
| rs602602    | <i>MINDY2</i>   | A             | -                     | -       | 1.48              | 0.16    |
| rs117618017 | <i>APH1B</i>    | T             | 1.70                  | 0.54    | 2.07              | 0.17    |
| rs889555    | <i>BCKDK</i>    | T             | 0.92                  | 0.76    | 1.07              | 0.83    |
| rs4985556   | <i>IL34</i>     | A             | 0.46                  | 0.22    | 0.86              | 0.81    |
| rs12446759  | <i>PLCG2</i>    | G             | 1.02                  | 0.95    | 0.94              | 0.82    |
| rs72824905  | <i>PLCG2</i>    | G             | -                     | -       | -                 | -       |
| rs7225151   | <i>SCIMP</i>    | A             | 1.19                  | 0.61    | 0.36              | 0.029   |
| rs199515    | <i>WNT3</i>     | G             | 1.04                  | 0.91    | 2.00              | 0.12    |
| rs616338    | <i>ABI3</i>     | T             | -                     | -       | -                 | -       |
| rs2526377   | <i>TSPOAP1</i>  | G             | -                     | -       | -                 | -       |
| rs4277405   | <i>ACE</i>      | C             | 1.28                  | 0.36    | 0.89              | 0.71    |
| rs12151021  | <i>ABCA7</i>    | A             | 1.61                  | 0.076   | 1.87              | 0.025   |
| rs6014724   | <i>CASS4</i>    | G             | 1.11                  | 0.82    | 1.25              | 0.56    |
| rs2830489   | <i>ADAMTS1</i>  | T             | 1.29                  | 0.62    | 0.92              | 0.85    |
| rs141749679 | <i>SORT1</i>    | C             | -                     | -       | -                 | -       |

|             |                         |   |      |       |      |                   |
|-------------|-------------------------|---|------|-------|------|-------------------|
| rs72777026  | <i>ADAM17</i>           | G | 1.48 | 0.20  | 1.13 | 0.72              |
| rs17020490  | <i>PRKD3</i>            | C | 1.35 | 0.38  | 0.83 | 0.57              |
| rs143080277 | <i>NCK2</i>             | C | -    | -     | -    | -                 |
| rs139643391 | <i>WDR12</i>            | T | 3.05 | 0.20  | 0.50 | 0.35 <sup>a</sup> |
| rs16824536  | <i>MME</i>              | A | 0.83 | 0.53  | 0.78 | 0.57              |
| rs61762319  | <i>MME</i>              | G | 0.83 | 0.90  | -    | -                 |
| rs3822030   | <i>IDUA</i>             | G | -    | -     | -    | -                 |
| rs2245466   | <i>RHOH</i>             | G | 0.87 | 0.64  | 1.11 | 0.70              |
| rs112403360 | <i>ANKH</i>             | A | 1.55 | 0.40  | 1.11 | 0.85              |
| rs62374257  | <i>COX7C</i>            | C | 1.21 | 0.73  | 1.51 | 0.23              |
| rs871269    | <i>TNIP1</i>            | T | 1.04 | 0.89  | 0.81 | 0.46              |
| rs113706587 | <i>RASGEF1C</i>         | A | 1.90 | 0.31  | 0.93 | 0.88              |
| rs785129    | <i>HS3ST5</i>           | T | 1.00 | 0.99  | 0.78 | 0.37              |
| rs6943429   | <i>UMAD1</i>            | T | 1.30 | 0.34  | 1.02 | 0.93              |
| rs10952097  | <i>ICA1</i>             | T | 1.28 | 0.41  | 0.82 | 0.53              |
| rs13237518  | <i>TMEM106B</i>         | A | 0.85 | 0.58  | 1.55 | 0.12              |
| rs1160871   | <i>JAZF1</i>            | G | 0.93 | 0.79  | -    | -                 |
| rs76928645  | <i>SEC61G</i>           | T | 2.22 | 0.52  | 1.66 | 0.38              |
| rs1065712   | <i>CTSB</i>             | C | -    | -     | -    | -                 |
| rs34173062  | <i>SHARPIN</i>          | A | -    | -     | 1.02 | 0.98              |
| rs1800978   | <i>ABCA1</i>            | G | -    | -     | -    | -                 |
| rs7068231   | <i>ANK3</i>             | T | 0.60 | 0.093 | 0.58 | 0.059             |
| rs6586028   | <i>TSPAN14</i>          | C | -    | -     | 0.96 | 0.93              |
| rs6584063   | <i>BLNK</i>             | G | 3.81 | 0.22  | 0.30 | 0.13              |
| rs7908662   | <i>PLEKHA1</i>          | G | 0.84 | 0.53  | 0.73 | 0.26              |
| rs6489896   | <i>TPCN1</i>            | C | 1.18 | 0.64  | 1.61 | 0.20              |
| rs7157106   | <i>IGH</i> gene cluster | A | -    | -     | 0.76 | 0.36              |
| rs10131280  | <i>IGH</i> gene cluster | A | 1.08 | 0.82  | 0.92 | 0.82              |
| rs3848143   | <i>SNX1</i>             | G | 0.72 | 0.24  | 1.35 | 0.30              |
| rs12592898  | <i>CTSH</i>             | A | 0.82 | 0.51  | 1.71 | 0.23              |
| rs1140239   | <i>DOC2A</i>            | T | 1.13 | 0.69  | 1.11 | 0.71              |
| rs450674    | <i>MAF</i>              | C | -    | -     | 0.82 | 0.55              |
| rs16941239  | <i>FOXF1</i>            | A | 0.80 | 0.50  | 0.83 | 0.66              |
| rs56407236  | <i>PRDM7</i>            | A | -    | -     | 5.15 | 0.026             |
| rs35048651  | <i>WDR81</i>            | T | 1.68 | 0.19  | -    | -                 |
| rs2242595   | <i>MYO15A</i>           | A | 0.77 | 0.52  | 1.73 | 0.13              |
| rs5848      | <i>GRN</i>              | T | 0.82 | 0.50  | 1.66 | 0.13              |
| rs149080927 | <i>KLF16</i>            | G | 0.85 | 0.66  | -    | -                 |
| rs9304690   | <i>SIGLEC11</i>         | T | 0.86 | 0.67  | 1.53 | 0.23              |
| rs587709    | <i>LILRB2</i>           | C | -    | -     | 1.01 | 0.97              |
| rs1358782   | <i>RBCK1</i>            | A | 0.89 | 0.73  | 0.46 | 0.043             |
| rs6742      | <i>SLC2A4RG</i>         | T | 1.24 | 0.50  | 1.05 | 0.90              |
| rs2154481   | <i>APP</i>              | C | -    | -     | 1.14 | 0.68              |

<sup>a</sup> OR and P-value were computed by the proxy (rs72934704) which was in perfect linkage disequilibrium block (i.e.,  $r^2 = 1$  and  $D' = 1$ )

**Supplementary Table 13.** Association with TDP-43 in any brain regions in people with other ancestries

| Variant     | Gene            | Effect allele | ADRC                  |         |                   |         |
|-------------|-----------------|---------------|-----------------------|---------|-------------------|---------|
|             |                 |               | ADSP WGS<br>(n = 140) |         | ADGC<br>(n = 134) |         |
|             |                 |               | OR                    | P-value | OR                | P-value |
| rs679515    | <i>CRI</i>      | T             | 1.28                  | 0.91    | 0.89              | 0.93    |
| rs6733839   | <i>BIN1</i>     | T             | 0.55                  | 0.25    | 2.14              | 0.11    |
| rs10933431  | <i>INPP5D</i>   | G             | 1.04                  | 0.94    | 1.20              | 0.70    |
| rs6846529   | <i>CLNK</i>     | C             | 0.46                  | 0.18    | -                 | -       |
| rs6605556   | <i>HLA-DQA1</i> | G             | -                     | -       | 0.58              | 0.42    |
| rs10947943  | <i>UNC5CL</i>   | A             | -                     | -       | 1.89              | 0.37    |
| rs143332484 | <i>TREM2</i>    | T             | -                     | -       | -                 | -       |
| rs75932628  | <i>TREM2</i>    | T             | -                     | -       | -                 | -       |
| rs60755019  | <i>TREML2</i>   | G             | 0.73                  | 0.56    | 0.69              | 0.65    |
| rs7767350   | <i>CD2AP</i>    | T             | 0.78                  | 0.67    | 3.71              | 0.044   |
| rs6966331   | <i>EPDR1</i>    | T             | 0.76                  | 0.61    | 0.58              | 0.42    |
| rs7384878   | <i>SPDYE3</i>   | C             | 0.87                  | 0.84    | 0.82              | 0.72    |
| rs11771145  | <i>EPHA1</i>    | A             | 0.61                  | 0.35    | 2.50              | 0.071   |
| rs73223431  | <i>PTK2B</i>    | T             | 1.31                  | 0.63    | 0.71              | 0.50    |
| rs11787077  | <i>CLU</i>      | T             | 0.89                  | 0.81    | 1.01              | 0.98    |
| rs7912495   | <i>USP6NL</i>   | G             | 0.91                  | 0.88    | 0.75              | 0.58    |
| rs10437655  | <i>SPI1</i>     | A             | 1.03                  | 0.96    | 0.87              | 0.79    |
| rs1582763   | <i>MS4A4A</i>   | A             | 0.09                  | 0.16    | 0.90              | 0.89    |
| rs3851179   | <i>EED</i>      | T             | 1.30                  | 0.67    | 0.43              | 0.14    |
| rs74685827  | <i>SORL1</i>    | G             | -                     | -       | -                 | -       |
| rs11218343  | <i>SORL1</i>    | C             | 0.63                  | 0.61    | 0.36              | 0.31    |
| rs17125924  | <i>FERMT2</i>   | G             | 1.56                  | 0.64    | 0.53              | 0.47    |
| rs7401792   | <i>SLC24A4</i>  | G             | 1.13                  | 0.81    | 0.75              | 0.60    |
| rs12590654  | <i>SLC24A4</i>  | A             | 0.65                  | 0.42    | 0.47              | 0.14    |
| rs8025980   | <i>SPPL2A</i>   | G             | 1.56                  | 0.35    | -                 | -       |
| rs602602    | <i>MINDY2</i>   | A             | -                     | -       | 0.78              | 0.62    |
| rs117618017 | <i>APH1B</i>    | T             | 1.93                  | 0.67    | 1.14              | 0.88    |
| rs889555    | <i>BCKDK</i>    | T             | 2.45                  | 0.083   | 1.61              | 0.34    |
| rs4985556   | <i>IL34</i>     | A             | 0.64                  | 0.73    | 1.23              | 0.84    |
| rs12446759  | <i>PLCG2</i>    | G             | 0.13                  | 0.0031  | 0.58              | 0.28    |
| rs72824905  | <i>PLCG2</i>    | G             | -                     | -       | -                 | -       |
| rs7225151   | <i>SCIMP</i>    | A             | 1.93                  | 0.26    | 0.67              | 0.64    |
| rs199515    | <i>WNT3</i>     | G             | 1.13                  | 0.84    | 0.88              | 0.87    |
| rs616338    | <i>ABI3</i>     | T             | -                     | -       | -                 | -       |
| rs2526377   | <i>TSPOAP1</i>  | G             | -                     | -       | -                 | -       |
| rs4277405   | <i>ACE</i>      | C             | 0.33                  | 0.026   | 1.12              | 0.83    |
| rs12151021  | <i>ABCA7</i>    | A             | 1.27                  | 0.59    | 0.57              | 0.23    |
| rs6014724   | <i>CASS4</i>    | G             | 0.01                  | 0.11    | 1.58              | 0.48    |
| rs2830489   | <i>ADAMTS1</i>  | T             | 1.21                  | 0.90    | 1.93              | 0.36    |
| rs141749679 | <i>SORT1</i>    | C             | -                     | -       | -                 | -       |

|             |                         |   |      |       |                   |       |
|-------------|-------------------------|---|------|-------|-------------------|-------|
| rs72777026  | <i>ADAM17</i>           | G | 0.89 | 0.82  | 0.58              | 0.30  |
| rs17020490  | <i>PRKD3</i>            | C | 0.68 | 0.59  | 2.50              | 0.15  |
| rs143080277 | <i>NCK2</i>             | C | -    | -     | -                 | -     |
| rs139643391 | <i>WDR12</i>            | T | -    | -     | 0.83 <sup>a</sup> | 0.89  |
| rs16824536  | <i>MME</i>              | A | 0.85 | 0.76  | 0.36              | 0.15  |
| rs61762319  | <i>MME</i>              | G | -    | -     | -                 | -     |
| rs3822030   | <i>IDUA</i>             | G | -    | -     | -                 | -     |
| rs2245466   | <i>RHOH</i>             | G | 2.03 | 0.21  | 1.48              | 0.39  |
| rs112403360 | <i>ANKH</i>             | A | 0.28 | 0.24  | 6.92              | 0.041 |
| rs62374257  | <i>COX7C</i>            | C | 0.36 | 0.33  | 1.10              | 0.86  |
| rs871269    | <i>TNIP1</i>            | T | 0.43 | 0.17  | 1.00              | 0.99  |
| rs113706587 | <i>RASGEF1C</i>         | A | 0.94 | 0.96  | 1.32              | 0.76  |
| rs785129    | <i>HS3ST5</i>           | T | 0.94 | 0.91  | 1.12              | 0.81  |
| rs6943429   | <i>UMAD1</i>            | T | 2.81 | 0.074 | 0.88              | 0.79  |
| rs10952097  | <i>ICAI</i>             | T | 0.90 | 0.84  | 0.76              | 0.61  |
| rs13237518  | <i>TMEM106B</i>         | A | 1.02 | 0.97  | 1.05              | 0.92  |
| rs1160871   | <i>JAZF1</i>            | G | 0.23 | 0.018 | -                 | -     |
| rs76928645  | <i>SEC61G</i>           | T | -    | -     | -                 | -     |
| rs1065712   | <i>CTSB</i>             | C | -    | -     | -                 | -     |
| rs34173062  | <i>SHARPIN</i>          | A | -    | -     | 3.07              | 0.47  |
| rs1800978   | <i>ABCA1</i>            | G | -    | -     | -                 | -     |
| rs7068231   | <i>ANK3</i>             | T | 0.75 | 0.67  | 1.24              | 0.63  |
| rs6586028   | <i>TSPAN14</i>          | C | -    | -     | 0.52              | 0.46  |
| rs6584063   | <i>BLNK</i>             | G | 1.13 | 0.93  | 0.86              | 0.86  |
| rs7908662   | <i>PLEKHA1</i>          | G | 0.91 | 0.87  | 0.46              | 0.11  |
| rs6489896   | <i>TPCN1</i>            | C | 0.92 | 0.91  | 0.37              | 0.23  |
| rs7157106   | <i>IGH</i> gene cluster | A | -    | -     | 1.50              | 0.46  |
| rs10131280  | <i>IGH</i> gene cluster | A | 0.52 | 0.36  | 3.21              | 0.10  |
| rs3848143   | <i>SNX1</i>             | G | 1.09 | 0.85  | 2.12              | 0.12  |
| rs12592898  | <i>CTSH</i>             | A | 0.79 | 0.66  | 0.49              | 0.36  |
| rs1140239   | <i>DOC2A</i>            | T | 0.96 | 0.95  | 1.04              | 0.94  |
| rs450674    | <i>MAF</i>              | C | -    | -     | 0.60              | 0.36  |
| rs16941239  | <i>FOXF1</i>            | A | 0.55 | 0.34  | 1.46              | 0.50  |
| rs56407236  | <i>PRDM7</i>            | A | -    | -     | 5.56              | 0.074 |
| rs35048651  | <i>WDR81</i>            | T | 0.89 | 0.88  | -                 | -     |
| rs2242595   | <i>MYO15A</i>           | A | 2.63 | 0.21  | 1.64              | 0.42  |
| rs5848      | <i>GRN</i>              | T | 1.47 | 0.48  | 2.36              | 0.14  |
| rs149080927 | <i>KLF16</i>            | G | 0.41 | 0.24  | -                 | -     |
| rs9304690   | <i>SIGLEC11</i>         | T | 0.69 | 0.60  | 2.37              | 0.18  |
| rs587709    | <i>LILRB2</i>           | C | -    | -     | 2.33              | 0.14  |
| rs1358782   | <i>RBCK1</i>            | A | 0.68 | 0.63  | 0.90              | 0.85  |
| rs6742      | <i>SLC2A4RG</i>         | T | 1.02 | 0.97  | 2.44              | 0.12  |
| rs2154481   | <i>APP</i>              | C | -    | -     | 1.56              | 0.44  |

<sup>a</sup> OR and P-value were computed by the proxy (rs72934704) which was in perfect linkage disequilibrium block (i.e.,  $r^2 = 1$  and  $D' = 1$ )

**Supplementary Table 14.** Association with Lewy bodies in any brain regions in people with other ancestries

| Variant     | Gene            | Effect allele | ADRC                  |         |                   |         |
|-------------|-----------------|---------------|-----------------------|---------|-------------------|---------|
|             |                 |               | ADSP WGS<br>(n = 140) |         | ADGC<br>(n = 134) |         |
|             |                 |               | OR                    | P-value | OR                | P-value |
| rs679515    | <i>CR1</i>      | T             | 2.45                  | 0.11    | 0.84              | 0.76    |
| rs6733839   | <i>BIN1</i>     | T             | 1.63                  | 0.071   | 1.56              | 0.14    |
| rs10933431  | <i>INPP5D</i>   | G             | 1.07                  | 0.78    | 1.01              | 0.97    |
| rs6846529   | <i>CLNK</i>     | C             | 1.08                  | 0.77    | -                 | -       |
| rs6605556   | <i>HLA-DQA1</i> | G             | -                     | -       | 0.91              | 0.81    |
| rs10947943  | <i>UNC5CL</i>   | A             | 1.61                  | 0.47    | 1.90              | 0.14    |
| rs143332484 | <i>TREM2</i>    | T             | -                     | -       | -                 | -       |
| rs75932628  | <i>TREM2</i>    | T             | -                     | -       | -                 | -       |
| rs60755019  | <i>TREML2</i>   | G             | 1.45                  | 0.22    | 1.46              | 0.47    |
| rs7767350   | <i>CD2AP</i>    | T             | 1.75                  | 0.072   | 0.92              | 0.81    |
| rs6966331   | <i>EPDR1</i>    | T             | 0.65                  | 0.12    | 1.19              | 0.60    |
| rs7384878   | <i>SPDYE3</i>   | C             | 1.17                  | 0.67    | 1.00              | 0.99    |
| rs11771145  | <i>EPHA1</i>    | A             | 1.11                  | 0.66    | 1.48              | 0.17    |
| rs73223431  | <i>PTK2B</i>    | T             | 0.99                  | 0.96    | 0.88              | 0.67    |
| rs11787077  | <i>CLU</i>      | T             | 0.85                  | 0.52    | 0.76              | 0.38    |
| rs7912495   | <i>USP6NL</i>   | G             | 1.40                  | 0.21    | 0.75              | 0.31    |
| rs10437655  | <i>SPI1</i>     | A             | 1.48                  | 0.16    | 1.02              | 0.95    |
| rs1582763   | <i>MS4A4A</i>   | A             | 0.57                  | 0.17    | 0.33              | 0.017   |
| rs3851179   | <i>EED</i>      | T             | 0.50                  | 0.060   | 1.12              | 0.72    |
| rs74685827  | <i>SORL1</i>    | G             | 1.25                  | 0.83    | 8.87              | 0.13    |
| rs11218343  | <i>SORL1</i>    | C             | 0.64                  | 0.37    | 0.55              | 0.34    |
| rs17125924  | <i>FERMT2</i>   | G             | 1.10                  | 0.85    | 1.04              | 0.94    |
| rs7401792   | <i>SLC24A4</i>  | G             | 1.43                  | 0.20    | 1.20              | 0.57    |
| rs12590654  | <i>SLC24A4</i>  | A             | 0.96                  | 0.87    | 0.89              | 0.71    |
| rs8025980   | <i>SPPL2A</i>   | G             | 0.44                  | 0.0026  | -                 | -       |
| rs602602    | <i>MINDY2</i>   | A             | -                     | -       | 1.17              | 0.59    |
| rs117618017 | <i>APH1B</i>    | T             | 0.74                  | 0.69    | 1.50              | 0.42    |
| rs889555    | <i>BCKDK</i>    | T             | 1.28                  | 0.32    | 0.69              | 0.24    |
| rs4985556   | <i>IL34</i>     | A             | 0.32                  | 0.11    | 0.96              | 0.95    |
| rs12446759  | <i>PLCG2</i>    | G             | 0.94                  | 0.82    | 1.02              | 0.96    |
| rs72824905  | <i>PLCG2</i>    | G             | -                     | -       | -                 | -       |
| rs7225151   | <i>SCIMP</i>    | A             | 0.92                  | 0.80    | 0.68              | 0.40    |
| rs199515    | <i>WNT3</i>     | G             | 1.39                  | 0.34    | 0.93              | 0.87    |
| rs616338    | <i>ABI3</i>     | T             | -                     | -       | -                 | -       |
| rs2526377   | <i>TSPOAP1</i>  | G             | -                     | -       | -                 | -       |
| rs4277405   | <i>ACE</i>      | C             | 0.92                  | 0.75    | 1.08              | 0.81    |
| rs12151021  | <i>ABCA7</i>    | A             | 1.49                  | 0.11    | 1.35              | 0.28    |
| rs6014724   | <i>CASS4</i>    | G             | 1.34                  | 0.49    | 0.81              | 0.61    |
| rs2830489   | <i>ADAMTS1</i>  | T             | 0.81                  | 0.67    | 0.52              | 0.18    |
| rs141749679 | <i>SORT1</i>    | C             | -                     | -       | -                 | -       |

|             |                         |   |      |        |      |                   |
|-------------|-------------------------|---|------|--------|------|-------------------|
| rs72777026  | <i>ADAM17</i>           | G | 0.93 | 0.81   | 1.14 | 0.70              |
| rs17020490  | <i>PRKD3</i>            | C | 0.90 | 0.74   | 1.07 | 0.84              |
| rs143080277 | <i>NCK2</i>             | C | -    | -      | -    | -                 |
| rs139643391 | <i>WDR12</i>            | T | 0.53 | 0.39   | 2.11 | 0.27 <sup>a</sup> |
| rs16824536  | <i>MME</i>              | A | 1.00 | 0.99   | 1.51 | 0.34              |
| rs61762319  | <i>MME</i>              | G | 1.13 | 0.93   | -    | -                 |
| rs3822030   | <i>IDUA</i>             | G | -    | -      | -    | -                 |
| rs2245466   | <i>RHOH</i>             | G | 1.34 | 0.31   | 1.17 | 0.59              |
| rs112403360 | <i>ANKH</i>             | A | 0.58 | 0.27   | 1.76 | 0.31              |
| rs62374257  | <i>COX7C</i>            | C | 0.71 | 0.51   | 1.61 | 0.16              |
| rs871269    | <i>TNIP1</i>            | T | 0.95 | 0.85   | 0.81 | 0.48              |
| rs113706587 | <i>RASGEF1C</i>         | A | 0.89 | 0.83   | 1.44 | 0.47              |
| rs785129    | <i>HS3ST5</i>           | T | 1.38 | 0.24   | 0.87 | 0.65              |
| rs6943429   | <i>UMAD1</i>            | T | 1.16 | 0.57   | 1.51 | 0.15              |
| rs10952097  | <i>ICAI</i>             | T | 1.21 | 0.52   | 1.54 | 0.20              |
| rs13237518  | <i>TMEM106B</i>         | A | 1.07 | 0.81   | 1.42 | 0.23              |
| rs1160871   | <i>JAZF1</i>            | G | 0.46 | 0.0061 | -    | -                 |
| rs76928645  | <i>SEC61G</i>           | T | 1.39 | 0.76   | 2.31 | 0.17              |
| rs1065712   | <i>CTSB</i>             | C | -    | -      | -    | -                 |
| rs34173062  | <i>SHARPIN</i>          | A | -    | -      | 0.56 | 0.51              |
| rs1800978   | <i>ABCA1</i>            | G | -    | -      | -    | -                 |
| rs7068231   | <i>ANK3</i>             | T | 1.12 | 0.69   | 0.48 | 0.017             |
| rs6586028   | <i>TSPAN14</i>          | C | -    | -      | 1.22 | 0.69              |
| rs6584063   | <i>BLNK</i>             | G | 3.59 | 0.14   | 1.46 | 0.54              |
| rs7908662   | <i>PLEKHA1</i>          | G | 1.02 | 0.93   | 1.08 | 0.78              |
| rs6489896   | <i>TPCN1</i>            | C | 1.83 | 0.074  | 0.94 | 0.87              |
| rs7157106   | <i>IGH</i> gene cluster | A | -    | -      | 1.33 | 0.37              |
| rs10131280  | <i>IGH</i> gene cluster | A | 1.47 | 0.22   | 0.73 | 0.45              |
| rs3848143   | <i>SNX1</i>             | G | 1.11 | 0.69   | 1.49 | 0.19              |
| rs12592898  | <i>CTSH</i>             | A | 0.63 | 0.13   | 0.94 | 0.90              |
| rs1140239   | <i>DOC2A</i>            | T | 1.02 | 0.96   | 1.43 | 0.23              |
| rs450674    | <i>MAF</i>              | C | -    | -      | 0.70 | 0.33              |
| rs16941239  | <i>FOXF1</i>            | A | 0.62 | 0.16   | 2.15 | 0.074             |
| rs56407236  | <i>PRDM7</i>            | A | -    | -      | 2.24 | 0.22              |
| rs35048651  | <i>WDR81</i>            | T | 1.34 | 0.42   | -    | -                 |
| rs2242595   | <i>MYO15A</i>           | A | 0.74 | 0.43   | 1.99 | 0.067             |
| rs5848      | <i>GRN</i>              | T | 0.77 | 0.35   | 1.62 | 0.16              |
| rs149080927 | <i>KLF16</i>            | G | 0.88 | 0.71   | -    | -                 |
| rs9304690   | <i>SIGLEC11</i>         | T | 0.52 | 0.077  | 2.21 | 0.029             |
| rs587709    | <i>LILRB2</i>           | C | -    | -      | 0.71 | 0.28              |
| rs1358782   | <i>RBCK1</i>            | A | 1.23 | 0.53   | 0.85 | 0.65              |
| rs6742      | <i>SLC2A4RG</i>         | T | 0.71 | 0.26   | 1.25 | 0.55              |
| rs2154481   | <i>APP</i>              | C | -    | -      | 0.50 | 0.037             |

<sup>a</sup> OR and P-value were computed by the proxy (rs72934704) which was in perfect linkage disequilibrium block (i.e.,  $r^2 = 1$  and  $D' = 1$ )

**Supplementary Table 15.** Association with hippocampal sclerosis in people with other ancestries

| Variant     | Gene            | Effect allele | ADRC                  |         |                   |         |
|-------------|-----------------|---------------|-----------------------|---------|-------------------|---------|
|             |                 |               | ADSP WGS<br>(n = 140) |         | ADGC<br>(n = 134) |         |
|             |                 |               | OR                    | P-value | OR                | P-value |
| rs679515    | <i>CR1</i>      | T             | 2.12                  | 0.59    | 0.48              | 0.54    |
| rs6733839   | <i>BIN1</i>     | T             | 1.25                  | 0.71    | 1.64              | 0.25    |
| rs10933431  | <i>INPP5D</i>   | G             | 0.71                  | 0.52    | 0.78              | 0.58    |
| rs6846529   | <i>CLNK</i>     | C             | 3.77                  | 0.042   | -                 | -       |
| rs6605556   | <i>HLA-DQA1</i> | G             | -                     | -       | 0.58              | 0.42    |
| rs10947943  | <i>UNC5CL</i>   | A             | -                     | -       | 2.94              | 0.069   |
| rs143332484 | <i>TREM2</i>    | T             | -                     | -       | -                 | -       |
| rs75932628  | <i>TREM2</i>    | T             | -                     | -       | -                 | -       |
| rs60755019  | <i>TREML2</i>   | G             | -                     | -       | 2.24              | 0.32    |
| rs7767350   | <i>CD2AP</i>    | T             | 3.39                  | 0.084   | 0.87              | 0.80    |
| rs6966331   | <i>EPDR1</i>    | T             | 0.69                  | 0.50    | 1.38              | 0.52    |
| rs7384878   | <i>SPDYE3</i>   | C             | 0.50                  | 0.41    | 0.37              | 0.10    |
| rs11771145  | <i>EPHA1</i>    | A             | 1.19                  | 0.74    | 1.20              | 0.68    |
| rs73223431  | <i>PTK2B</i>    | T             | 0.49                  | 0.36    | 0.60              | 0.31    |
| rs11787077  | <i>CLU</i>      | T             | 5.24                  | 0.020   | 2.00              | 0.16    |
| rs7912495   | <i>USP6NL</i>   | G             | 0.41                  | 0.20    | 1.25              | 0.63    |
| rs10437655  | <i>SPI1</i>     | A             | 0.24                  | 0.086   | 1.28              | 0.61    |
| rs1582763   | <i>MS4A4A</i>   | A             | 0.33                  | 0.34    | 4.32              | 0.014   |
| rs3851179   | <i>EED</i>      | T             | 1.44                  | 0.58    | 0.63              | 0.36    |
| rs74685827  | <i>SORL1</i>    | G             | -                     | -       | 1.66              | 0.73    |
| rs11218343  | <i>SORL1</i>    | C             | 17.34                 | 0.0046  | 0.40              | 0.32    |
| rs17125924  | <i>FERMT2</i>   | G             | 2.86                  | 0.30    | 1.02              | 0.98    |
| rs7401792   | <i>SLC24A4</i>  | G             | 0.68                  | 0.50    | 1.03              | 0.94    |
| rs12590654  | <i>SLC24A4</i>  | A             | -                     | -       | 0.78              | 0.59    |
| rs8025980   | <i>SPPL2A</i>   | G             | 0.75                  | 0.61    | -                 | -       |
| rs602602    | <i>MINDY2</i>   | A             | -                     | -       | 1.05              | 0.92    |
| rs117618017 | <i>APH1B</i>    | T             | -                     | -       | 0.40              | 0.43    |
| rs889555    | <i>BCKDK</i>    | T             | 1.06                  | 0.91    | 1.26              | 0.65    |
| rs4985556   | <i>IL34</i>     | A             | 1.40                  | 0.79    | 1.27              | 0.78    |
| rs12446759  | <i>PLCG2</i>    | G             | 0.83                  | 0.76    | 0.43              | 0.077   |
| rs72824905  | <i>PLCG2</i>    | G             | -                     | -       | -                 | -       |
| rs7225151   | <i>SCIMP</i>    | A             | 1.92                  | 0.27    | 0.79              | 0.76    |
| rs199515    | <i>WNT3</i>     | G             | 0.91                  | 0.89    | 1.16              | 0.83    |
| rs616338    | <i>ABI3</i>     | T             | -                     | -       | -                 | -       |
| rs2526377   | <i>TSPOAP1</i>  | G             | -                     | -       | -                 | -       |
| rs4277405   | <i>ACE</i>      | C             | 0.62                  | 0.36    | 1.72              | 0.31    |
| rs12151021  | <i>ABCA7</i>    | A             | 1.43                  | 0.49    | 1.75              | 0.19    |
| rs6014724   | <i>CASS4</i>    | G             | 1.40                  | 0.71    | 1.24              | 0.72    |
| rs2830489   | <i>ADAMTS1</i>  | T             | 4.66                  | 0.15    | 1.77              | 0.39    |
| rs141749679 | <i>SORT1</i>    | C             | -                     | -       | -                 | -       |



|             |                         |   |      |       |       |                   |
|-------------|-------------------------|---|------|-------|-------|-------------------|
| rs72777026  | <i>ADAM17</i>           | G | 0.54 | 0.35  | 0.43  | 0.17              |
| rs17020490  | <i>PRKD3</i>            | C | 0.40 | 0.31  | 1.96  | 0.20              |
| rs143080277 | <i>NCK2</i>             | C | -    | -     | -     | -                 |
| rs139643391 | <i>WDR12</i>            | T | -    | -     | 0.62  | 0.71 <sup>a</sup> |
| rs16824536  | <i>MME</i>              | A | 0.54 | 0.39  | 0.59  | 0.45              |
| rs61762319  | <i>MME</i>              | G | -    | -     | -     | -                 |
| rs3822030   | <i>IDUA</i>             | G | -    | -     | -     | -                 |
| rs2245466   | <i>RHOH</i>             | G | 2.38 | 0.17  | 0.48  | 0.12              |
| rs112403360 | <i>ANKH</i>             | A | 1.87 | 0.51  | 13.25 | 0.0014            |
| rs62374257  | <i>COX7C</i>            | C | 0.76 | 0.82  | 0.92  | 0.88              |
| rs871269    | <i>TNIP1</i>            | T | 1.05 | 0.94  | 0.50  | 0.16              |
| rs113706587 | <i>RASGEF1C</i>         | A | 1.43 | 0.71  | 3.53  | 0.11              |
| rs785129    | <i>HS3ST5</i>           | T | 0.86 | 0.79  | 0.50  | 0.14              |
| rs6943429   | <i>UMAD1</i>            | T | 0.62 | 0.45  | 1.75  | 0.22              |
| rs10952097  | <i>ICA1</i>             | T | 0.63 | 0.44  | 0.75  | 0.53              |
| rs13237518  | <i>TMEM106B</i>         | A | 3.83 | 0.075 | 1.25  | 0.65              |
| rs1160871   | <i>JAZF1</i>            | G | -    | -     | -     | -                 |
| rs76928645  | <i>SEC61G</i>           | T | -    | -     | -     | -                 |
| rs1065712   | <i>CTSB</i>             | C | -    | -     | -     | -                 |
| rs34173062  | <i>SHARPIN</i>          | A | -    | -     | -     | -                 |
| rs1800978   | <i>ABCA1</i>            | G | -    | -     | -     | -                 |
| rs7068231   | <i>ANK3</i>             | T | 1.11 | 0.88  | 0.89  | 0.80              |
| rs6586028   | <i>TSPAN14</i>          | C | -    | -     | 0.42  | 0.44              |
| rs6584063   | <i>BLNK</i>             | G | 3.81 | 0.34  | 0.36  | 0.38              |
| rs7908662   | <i>PLEKHA1</i>          | G | 1.37 | 0.62  | 0.78  | 0.56              |
| rs6489896   | <i>TPCN1</i>            | C | 1.10 | 0.89  | 0.97  | 0.96              |
| rs7157106   | <i>IGH</i> gene cluster | A | -    | -     | 2.39  | 0.13              |
| rs10131280  | <i>IGH</i> gene cluster | A | 0.35 | 0.21  | 0.78  | 0.71              |
| rs3848143   | <i>SNX1</i>             | G | 0.59 | 0.33  | 2.21  | 0.093             |
| rs12592898  | <i>CTSH</i>             | A | 0.40 | 0.22  | 1.47  | 0.54              |
| rs1140239   | <i>DOC2A</i>            | T | 1.24 | 0.77  | 2.00  | 0.10              |
| rs450674    | <i>MAF</i>              | C | -    | -     | 0.99  | 0.98              |
| rs16941239  | <i>FOXF1</i>            | A | 0.97 | 0.97  | 1.12  | 0.86              |
| rs56407236  | <i>PRDM7</i>            | A | -    | -     | 2.36  | 0.36              |
| rs35048651  | <i>WDR81</i>            | T | -    | -     | -     | -                 |
| rs2242595   | <i>MYO15A</i>           | A | 2.18 | 0.38  | 0.92  | 0.88              |
| rs5848      | <i>GRN</i>              | T | 1.94 | 0.30  | 1.48  | 0.47              |
| rs149080927 | <i>KLF16</i>            | G | 0.25 | 0.082 | -     | -                 |
| rs9304690   | <i>SIGLEC11</i>         | T | 1.17 | 0.83  | 1.71  | 0.35              |
| rs587709    | <i>LILRB2</i>           | C | -    | -     | 0.92  | 0.85              |
| rs1358782   | <i>RBCK1</i>            | A | 3.05 | 0.11  | 0.54  | 0.33              |
| rs6742      | <i>SLC2A4RG</i>         | T | 0.87 | 0.85  | 1.35  | 0.57              |
| rs2154481   | <i>APP</i>              | C | -    | -     | 0.67  | 0.43              |

<sup>a</sup> OR and P-value were computed by the proxy (rs72934704) which was in perfect linkage disequilibrium block (i.e.,  $r^2 = 1$  and  $D' = 1$ )

**Supplementary Table 16.** Association results from meta-analysis (ADSP WGS and ADGC) in people with other ancestries

| Variant     | Gene           | Braak NFT stage |         | Neocortical neuritic plaques |         | TDP-43 in any brain regions |         | Lewy bodies in any brain regions |         | Hippocampal sclerosis |         |
|-------------|----------------|-----------------|---------|------------------------------|---------|-----------------------------|---------|----------------------------------|---------|-----------------------|---------|
|             |                | OR              | P-value | OR                           | P-value | OR                          | P-value | OR                               | P-value | OR                    | P-value |
| rs679515    | <i>CRI</i>     | 0.87            | 0.76    | 0.54                         | 0.11    | 0.99                        | 0.98    | 1.41                             | 0.36    | 0.90                  | 0.92    |
| rs6733839   | <i>BIN1</i>    | 1.49            | 0.046   | 1.74                         | 0.0063  | 1.14                        | 0.76    | 1.60                             | 0.020   | 1.50                  | 0.27    |
| rs10933431  | <i>INPP5D</i>  | 1.00            | 1.00    | 0.95                         | 0.84    | 1.12                        | 0.75    | 1.05                             | 0.82    | 0.75                  | 0.40    |
| rs10947943  | <i>UNC5CL</i>  | 0.96            | 0.91    | 1.07                         | 0.96    | 1.35                        | 0.66    | 1.81                             | 0.12    | 2.21                  | 0.26    |
| rs60755019  | <i>TREML2</i>  | 1.09            | 0.73    | 0.92                         | 0.68    | 0.71                        | 0.46    | 1.45                             | 0.16    | -                     | -       |
| rs7767350   | <i>CD2AP</i>   | 1.29            | 0.23    | 1.27                         | 0.30    | 1.56                        | 0.26    | 1.29                             | 0.27    | 1.48                  | 0.34    |
| rs6966331   | <i>EPDR1</i>   | 0.91            | 0.65    | 0.98                         | 0.90    | 0.69                        | 0.35    | 0.84                             | 0.46    | 1.01                  | 0.98    |
| rs7384878   | <i>SPDYE3</i>  | 0.87            | 0.67    | 1.10                         | 0.65    | 0.84                        | 0.69    | 1.07                             | 0.77    | 0.41                  | 0.077   |
| rs11771145  | <i>EPHA1</i>   | 0.97            | 0.86    | 1.16                         | 0.43    | 1.27                        | 0.53    | 1.25                             | 0.21    | 1.19                  | 0.60    |
| rs73223431  | <i>PTK2B</i>   | 1.12            | 0.60    | 1.46                         | 0.073   | 0.93                        | 0.89    | 0.94                             | 0.74    | 0.57                  | 0.17    |
| rs11787077  | <i>CLU</i>     | 1.07            | 0.74    | 0.96                         | 0.80    | 0.95                        | 0.88    | 0.81                             | 0.28    | 2.74                  | 0.010   |
| rs7912495   | <i>USP6NL</i>  | 1.48            | 0.049   | 1.37                         | 0.10    | 0.82                        | 0.62    | 1.04                             | 0.86    | 0.88                  | 0.61    |
| rs10437655  | <i>SPII</i>    | 1.12            | 0.59    | 0.99                         | 0.97    | 0.95                        | 0.87    | 1.24                             | 0.31    | 0.83                  | 0.45    |
| rs1582763   | <i>MS4A4A</i>  | 1.21            | 0.46    | 1.38                         | 0.26    | 0.64                        | 0.28    | 0.45                             | 0.0078  | 2.53                  | 0.23    |
| rs3851179   | <i>EED</i>     | 1.15            | 0.62    | 1.06                         | 0.89    | 0.72                        | 0.46    | 0.78                             | 0.27    | 0.86                  | 0.75    |
| rs74685827  | <i>SORL1</i>   | 1.93            | 0.47    | 2.63                         | 0.30    | -                           | -       | 2.38                             | 0.27    | 1.66                  | 0.79    |
| rs11218343  | <i>SORL1</i>   | 0.95            | 0.88    | 0.63                         | 0.17    | 0.49                        | 0.28    | 0.60                             | 0.19    | 2.20                  | 0.26    |
| rs17125924  | <i>FERMT2</i>  | 0.89            | 0.75    | 1.40                         | 0.37    | 0.87                        | 0.86    | 1.07                             | 0.85    | 1.50                  | 0.47    |
| rs7401792   | <i>SLC24A4</i> | 0.86            | 0.42    | 1.02                         | 0.95    | 0.93                        | 0.84    | 1.32                             | 0.19    | 0.88                  | 0.69    |
| rs12590654  | <i>SLC24A4</i> | 0.90            | 0.59    | 0.99                         | 0.95    | 0.55                        | 0.10    | 0.93                             | 0.70    | 0.62                  | 0.17    |
| rs117618017 | <i>APH1B</i>   | 2.02            | 0.17    | 1.96                         | 0.16    | 1.30                        | 0.68    | 1.21                             | 0.78    | 0.40                  | 0.51    |
| rs889555    | <i>BCKDK</i>   | 1.04            | 0.80    | 0.98                         | 0.95    | 1.98                        | 0.057   | 1.01                             | 0.91    | 1.17                  | 0.68    |
| rs4985556   | <i>IL34</i>    | 0.73            | 0.46    | 0.63                         | 0.29    | 0.96                        | 0.92    | 0.58                             | 0.24    | 1.31                  | 0.70    |
| rs12446759  | <i>PLCG2</i>   | 1.14            | 0.54    | 0.98                         | 0.91    | 0.35                        | 0.0042  | 0.97                             | 0.90    | 0.55                  | 0.13    |
| rs7225151   | <i>SCIMP</i>   | 0.66            | 0.10    | 0.78                         | 0.24    | 1.38                        | 0.64    | 0.83                             | 0.44    | 1.39                  | 0.61    |
| rs199515    | <i>WNT3</i>    | 1.06            | 0.81    | 1.34                         | 0.24    | 1.03                        | 0.98    | 1.20                             | 0.57    | 1.02                  | 0.95    |
| rs4277405   | <i>ACE</i>     | 0.94            | 0.67    | 1.10                         | 0.69    | 0.59                        | 0.16    | 0.98                             | 0.95    | 1.02                  | 0.88    |
| rs12151021  | <i>ABCA7</i>   | 1.68            | 0.0072  | 1.73                         | 0.0046  | 0.86                        | 0.63    | 1.43                             | 0.057   | 1.61                  | 0.15    |
| rs6014724   | <i>CASS4</i>   | 1.01            | 0.93    | 1.19                         | 0.57    | 1.22                        | 0.54    | 1.03                             | 0.90    | 1.28                  | 0.61    |

|             |                         |      |       |      |       |      |      |      |      |      |        |
|-------------|-------------------------|------|-------|------|-------|------|------|------|------|------|--------|
| rs2830489   | <i>ADAMTS1</i>          | 1.01 | 0.91  | 1.06 | 0.82  | 1.78 | 0.46 | 0.65 | 0.21 | 2.32 | 0.11   |
| rs72777026  | <i>ADAM17</i>           | 1.22 | 0.40  | 1.31 | 0.24  | 0.73 | 0.37 | 1.01 | 0.92 | 0.48 | 0.098  |
| rs17020490  | <i>PRKD3</i>            | 1.16 | 0.48  | 1.04 | 0.83  | 1.40 | 0.53 | 0.98 | 0.92 | 1.31 | 0.79   |
| rs139643391 | <i>WDR12</i>            | 1.68 | 0.29  | 1.08 | 0.79  | -    | -    | 1.12 | 0.87 | -    | -      |
| rs16824536  | <i>MME</i>              | 0.54 | 0.021 | 0.82 | 0.40  | 0.63 | 0.22 | 1.13 | 0.51 | 0.56 | 0.26   |
| rs2245466   | <i>RHOH</i>             | 1.51 | 0.055 | 0.99 | 0.95  | 1.68 | 0.13 | 1.25 | 0.27 | 0.85 | 0.80   |
| rs112403360 | <i>ANKH</i>             | 2.05 | 0.074 | 1.32 | 0.47  | 1.70 | 0.54 | 0.95 | 0.95 | 5.82 | 0.0048 |
| rs62374257  | <i>COX7C</i>            | 1.46 | 0.25  | 1.42 | 0.28  | 0.86 | 0.57 | 1.26 | 0.61 | 0.89 | 0.79   |
| rs871269    | <i>TNIP1</i>            | 0.76 | 0.16  | 0.92 | 0.68  | 0.75 | 0.34 | 0.88 | 0.53 | 0.65 | 0.31   |
| rs113706587 | <i>RASGEF1C</i>         | 1.18 | 0.60  | 1.22 | 0.54  | 1.15 | 0.86 | 1.17 | 0.72 | 2.41 | 0.15   |
| rs785129    | <i>HS3ST5</i>           | 0.78 | 0.22  | 0.88 | 0.54  | 1.04 | 0.93 | 1.12 | 0.60 | 0.62 | 0.20   |
| rs6943429   | <i>UMAD1</i>            | 1.12 | 0.54  | 1.15 | 0.46  | 1.39 | 0.28 | 1.31 | 0.15 | 1.23 | 0.68   |
| rs10952097  | <i>ICAI</i>             | 1.30 | 0.22  | 1.04 | 0.88  | 0.82 | 0.62 | 1.34 | 0.17 | 0.70 | 0.33   |
| rs13237518  | <i>TMEM106B</i>         | 1.06 | 0.75  | 1.15 | 0.49  | 1.04 | 0.92 | 1.22 | 0.31 | 1.73 | 0.13   |
| rs76928645  | <i>SEC61G</i>           | 1.20 | 0.62  | 1.75 | 0.29  | -    | -    | 2.04 | 0.25 | -    | -      |
| rs7068231   | <i>ANK3</i>             | 0.72 | 0.11  | 0.59 | 0.012 | 1.06 | 0.97 | 0.75 | 0.16 | 0.95 | 0.92   |
| rs6584063   | <i>BLNK</i>             | 0.93 | 0.97  | 0.71 | 0.84  | 0.93 | 0.95 | 1.99 | 0.14 | 0.97 | 0.99   |
| rs7908662   | <i>PLEKHA1</i>          | 0.80 | 0.21  | 0.78 | 0.21  | 0.62 | 0.21 | 1.05 | 0.80 | 0.93 | 0.91   |
| rs6489896   | <i>TPCNI</i>            | 0.93 | 0.79  | 1.36 | 0.22  | 0.64 | 0.35 | 1.37 | 0.25 | 1.03 | 0.96   |
| rs10131280  | <i>IGH</i> gene cluster | 1.08 | 0.76  | 1.00 | 1.00  | 1.31 | 0.61 | 1.14 | 0.73 | 0.57 | 0.26   |
| rs3848143   | <i>SNX1</i>             | 1.25 | 0.26  | 0.97 | 0.92  | 1.52 | 0.21 | 1.26 | 0.23 | 1.24 | 0.54   |
| rs12592898  | <i>CTSH</i>             | 0.62 | 0.081 | 1.03 | 0.71  | 0.69 | 0.34 | 0.71 | 0.25 | 0.86 | 0.72   |
| rs1140239   | <i>DOC2A</i>            | 1.12 | 0.61  | 1.12 | 0.58  | 1.01 | 0.99 | 1.21 | 0.38 | 1.77 | 0.16   |
| rs16941239  | <i>FOXF1</i>            | 0.81 | 0.46  | 0.81 | 0.43  | 0.94 | 0.84 | 1.00 | 0.81 | 1.05 | 0.92   |
| rs2242595   | <i>MYO15A</i>           | 0.82 | 0.43  | 1.20 | 0.55  | 1.97 | 0.15 | 1.23 | 0.47 | 1.18 | 0.64   |
| rs5848      | <i>GRN</i>              | 1.14 | 0.54  | 1.13 | 0.56  | 1.84 | 0.12 | 1.04 | 0.76 | 1.66 | 0.22   |
| rs9304690   | <i>SIGLEC11</i>         | 1.37 | 0.24  | 1.15 | 0.59  | 1.37 | 0.56 | 1.08 | 0.78 | 1.49 | 0.40   |
| rs1358782   | <i>RBCK1</i>            | 0.58 | 0.029 | 0.66 | 0.097 | 0.82 | 0.63 | 1.04 | 0.89 | 1.20 | 0.72   |
| rs6742      | <i>SLC2A4RG</i>         | 0.98 | 0.92  | 1.15 | 0.57  | 1.64 | 0.25 | 0.89 | 0.71 | 1.16 | 0.76   |

NFT = neurofibrillary tangle; TDP-43 = TAR DNA binding protein 43 kDa; ADSP = Alzheimer's Disease Sequencing Project; WGS = whole genome sequencing; ADGC = Alzheimer's Disease Genetics Consortium;

**Supplementary Table 17.** Summary of association from sensitivity analysis in people with European ancestry including cases with rare disease

| Gene                             | Variant     | Meta-analysis |                       |
|----------------------------------|-------------|---------------|-----------------------|
|                                  |             | NP-OR         | P-value               |
| Braak NFT stage                  |             |               |                       |
| <i>BIN1</i>                      | rs6733839   | 1.33          | $5.8 \times 10^{-10}$ |
| <i>CR1</i>                       | rs679515    | 1.20          | 0.0012                |
| <i>MME</i>                       | rs16824536  | 0.74          | 0.0030                |
| <i>COX7C</i>                     | rs62374257  | 1.19          | $7.9 \times 10^{-4}$  |
| <i>SPI1</i>                      | rs10437655  | 1.13          | 0.0054                |
| <i>EED/PICALM</i>                | rs3851179   | 0.88          | 0.0045                |
| <i>INPP5D</i>                    | rs10933431  | 0.85          | 0.0024                |
| Neocortical neuritic plaques     |             |               |                       |
| <i>BIN1</i>                      | rs6733839   | 1.22          | $5.7 \times 10^{-6}$  |
| <i>EED/PICALM</i>                | rs3851179   | 0.85          | $2.9 \times 10^{-4}$  |
| <i>MME</i>                       | rs16824536  | 0.73          | 0.0020                |
| <i>APH1B</i>                     | rs117618017 | 1.25          | $5.8 \times 10^{-4}$  |
| <i>RBCK1</i>                     | rs1358782   | 0.86          | 0.0033                |
| <i>FERMT2</i>                    | rs17125924  | 1.28          | 0.0014                |
| <i>PTK2B</i>                     | rs73223431  | 1.11          | 0.024                 |
| TDP-43 in any brain regions      |             |               |                       |
| <i>TMEM106B</i>                  | rs13237518  | 0.75          | $8.1 \times 10^{-7}$  |
| <i>SORL1</i>                     | rs74685827  | 1.72          | 0.0061                |
| <i>GRN</i>                       | rs5848      | 1.27          | $1.6 \times 10^{-4}$  |
| <i>TPCN1</i>                     | rs6489896   | 1.42          | 0.0033                |
| Lewy bodies in any brain regions |             |               |                       |
| <i>BIN1</i>                      | rs6733839   | 1.16          | $9.2 \times 10^{-4}$  |
| <i>USP6NL</i>                    | rs7912495   | 1.14          | 0.0031                |
| Hippocampal sclerosis            |             |               |                       |
| <i>TMEM106B</i>                  | rs13237518  | 0.61          | $7.3 \times 10^{-9}$  |
| <i>GRN</i>                       | rs5848      | 1.57          | $4.3 \times 10^{-8}$  |
| <i>WNT3</i>                      | rs199515    | 0.74          | 0.0032                |
| <i>TNIP1</i>                     | rs871269    | 0.78          | 0.0026                |
| <i>ACE</i>                       | rs4277405   | 1.18          | 0.029                 |
| <i>SCIMP</i>                     | rs7225151   | 1.38          | 0.0028                |

NP = neuropathology; OR = odds ratio; NFT = neurofibrillary tangle; TDP-43 = TAR DNA binding protein 43 kDa

**Supplementary Table 18.** Summary of association from sensitivity analysis for different dichotomized neuropathologies

| Gene                                                                                                | Variant           | Meta-analysis |                                        |
|-----------------------------------------------------------------------------------------------------|-------------------|---------------|----------------------------------------|
|                                                                                                     |                   | NP-OR         | P-value                                |
| Braak NFT stage IV-VI vs. 0-III                                                                     |                   |               |                                        |
| <i>BIN1</i>                                                                                         | rs6733839         | 1.38          | $1.3 \times 10^{-10}$                  |
| <i>CR1</i>                                                                                          | rs679515          | 1.14          | 0.038                                  |
| <i>MME</i>                                                                                          | rs16824536        | 0.74          | 0.0040                                 |
| <i>COX7C</i>                                                                                        | rs62374257        | 1.21          | 0.0017                                 |
| <i>SPI1</i>                                                                                         | rs10437655        | 1.16          | 0.0023                                 |
| <i>EED/PICALM</i>                                                                                   | rs3851179         | 0.96          | 0.41                                   |
| <i>INPP5D</i>                                                                                       | rs10933431        | 0.79          | $5.8 \times 10^{-5}$                   |
| <i>ADAM17</i>                                                                                       | <b>rs72777026</b> | <b>1.24</b>   | <b>0.0038</b>                          |
| <i>TMEM106B</i>                                                                                     | <b>rs13237518</b> | <b>1.16</b>   | <b>0.0025</b>                          |
| Neocortical neuritic plaques moderate/frequent vs. no/sparse <sup>a</sup>                           |                   |               |                                        |
| <i>BIN1</i>                                                                                         | rs6733839         | 1.29          | $2.8 \times 10^{-7}$                   |
| <i>EED/PICALM</i>                                                                                   | rs3851179         | 0.88          | 0.014                                  |
| <i>MME</i>                                                                                          | rs16824536        | 0.68          | $2.7 \times 10^{-4}$                   |
| <i>APH1B</i>                                                                                        | rs117618017       | 1.15          | 0.045                                  |
| <i>RBCK1</i>                                                                                        | rs1358782         | 0.95          | 0.37                                   |
| <i>FERMT2</i>                                                                                       | rs17125924        | 1.16          | 0.11                                   |
| <i>PTK2B</i>                                                                                        | rs73223431        | 1.11          | 0.026                                  |
| <i>CR1</i>                                                                                          | <b>rs679515</b>   | <b>1.25</b>   | <b><math>5.3 \times 10^{-4}</math></b> |
| <i>INPP5D</i>                                                                                       | <b>rs10933431</b> | <b>0.82</b>   | <b><math>7.6 \times 10^{-4}</math></b> |
| <i>SPDYE3</i>                                                                                       | <b>rs7384878</b>  | <b>0.83</b>   | <b><math>4.7 \times 10^{-4}</math></b> |
| <i>TPCN1</i>                                                                                        | <b>rs6489896</b>  | <b>1.33</b>   | <b>0.0062</b>                          |
| TDP-43 in hippocampus/entorhinal or inferior temporal cortex/neocortex vs. no/amygdala <sup>b</sup> |                   |               |                                        |
| <i>TMEM106B</i>                                                                                     | rs13237518        | 0.66          | $7.4 \times 10^{-10}$                  |
| <i>SORL1</i>                                                                                        | rs74685827        | 2.14          | $6.0 \times 10^{-4}$                   |
| <i>GRN</i>                                                                                          | rs5848            | 1.29          | $3.6 \times 10^{-4}$                   |
| <i>TPCN1</i>                                                                                        | rs6489896         | 1.20          | 0.18                                   |
| <i>IGH gene cluster</i>                                                                             | <b>rs10131280</b> | <b>0.77</b>   | <b>0.0090</b>                          |
| Lewy bodies in neocortical vs. no/other regions <sup>c</sup>                                        |                   |               |                                        |
| <i>BIN1</i>                                                                                         | rs6733839         | 1.14          | 0.038                                  |
| <i>USP6NL</i>                                                                                       | rs7912495         | 1.09          | 0.16                                   |

Bold results indicate the additional SNVs that were associated with the different operationalization for severities in neuropathologies.

<sup>a</sup> Probable/definite vs. no AD/possible in ROSMAP

<sup>b</sup> Amygdala + limbic/amygdala + limbic + neocortical vs. no/amygdala in ROSMAP/

<sup>c</sup> Neocortical-type vs. not present/nigral-predominant/limbic-type in ROSMAP

NP = neuropathology; OR = odds ratio; NFT = neurofibrillary tangle; TDP-43 = TAR DNA binding protein 43 kDa; ROSMAP = Religious Orders Study (ROS) and Memory and Aging Project (MAP)

**Supplementary Table 19.** Association of *APOE* diplotype from meta-analysis in people with European ancestry and other ancestries

| <i>APOE</i> diplotype <sup>a</sup>      | Meta-analysis      |                          |                    |                        |
|-----------------------------------------|--------------------|--------------------------|--------------------|------------------------|
|                                         | European ancestry  |                          | Other ancestries   |                        |
|                                         | NP-OR <sup>b</sup> | P-value                  | NP-OR <sup>b</sup> | P-value                |
| <b>Braak NFT stage</b>                  |                    |                          |                    |                        |
| ε2/ε3                                   | 0.45               | 5.2 × 10 <sup>-8</sup>   | 0.35               | 0.085                  |
| ε2/ε4                                   | 1.51               | 0.045                    | 1.89               | 0.41                   |
| ε3/ε4                                   | 2.54               | 7.4 × 10 <sup>-34</sup>  | 4.11               | 3.7 × 10 <sup>-5</sup> |
| ε4/ε4                                   | 5.89               | 9.0 × 10 <sup>-24</sup>  | 9.09               | 0.067                  |
| <b>Neocortical neuritic plaques</b>     |                    |                          |                    |                        |
| ε2/ε3                                   | 0.47               | 9.2 × 10 <sup>-7</sup>   | 0.63               | 0.44                   |
| ε2/ε4                                   | 1.60               | 0.018                    | 1.22               | 0.83                   |
| ε3/ε4                                   | 2.47               | 4.6 × 10 <sup>-33</sup>  | 5.72               | 5.7 × 10 <sup>-7</sup> |
| ε4/ε4                                   | 3.88               | 1.95 × 10 <sup>-19</sup> | 7.44               | 0.0019                 |
| <b>TDP-43 in any brain regions</b>      |                    |                          |                    |                        |
| ε2/ε3                                   | 0.89               | 0.51                     | -                  | -                      |
| ε2/ε4                                   | 1.09               | 0.80                     | 1.93               | 0.59                   |
| ε3/ε4                                   | 1.97               | 3.9 × 10 <sup>-10</sup>  | 1.30               | 0.80                   |
| ε4/ε4                                   | 2.85               | 1.6 × 10 <sup>-5</sup>   | 4.93               | 0.45                   |
| <b>Lewy bodies in any brain regions</b> |                    |                          |                    |                        |
| ε2/ε3                                   | 0.89               | 0.47                     | 0.72               | 0.50                   |
| ε2/ε4                                   | 1.05               | 0.63                     | 2.62               | 0.27                   |
| ε3/ε4                                   | 1.63               | 2.6 × 10 <sup>-10</sup>  | 2.02               | 0.028                  |
| ε4/ε4                                   | 2.13               | 1.0 × 10 <sup>-6</sup>   | 3.42               | 0.035                  |
| <b>Hippocampal sclerosis</b>            |                    |                          |                    |                        |
| ε2/ε3                                   | 0.96               | 0.94                     | 1.19               | 0.85                   |
| ε2/ε4                                   | 1.06               | 0.86                     | 7.85               | 0.40                   |
| ε3/ε4                                   | 1.83               | 1.1 × 10 <sup>-5</sup>   | 1.26               | 0.99                   |
| ε4/ε4                                   | 2.22               | 0.0027                   | 2.46               | 0.67                   |

<sup>a</sup> *APOE* diplotype was determined with rs429358 and rs7412. Because nobody has ε2/ε2 in ADSP WGS, we removed people with ε2/ε2 from ROSMAP and ADGC.

<sup>b</sup> The reference group is ε3/ε3.

*Abbreviations:* NFT = neurofibrillary tangle; NP = neuropathology; OR = odds ratio; TDP-43 = TAR DNA binding protein 43 kDa

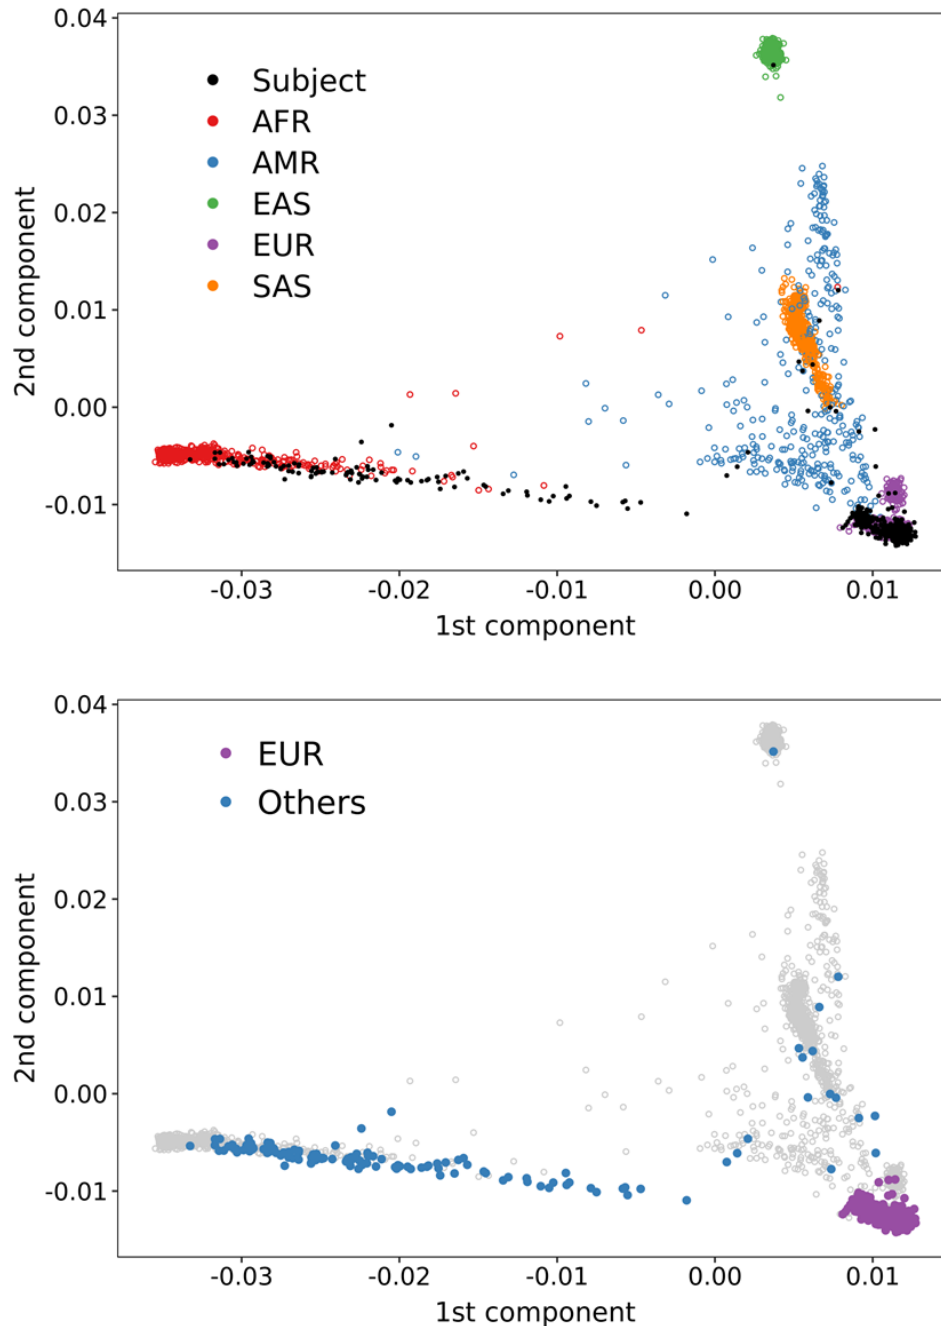

**Supplementary Figure 1.** First and second principal components plots along with 1000 genome reference samples. Block dots indicate individuals in the ADSP WGS dataset. The upper plot represents the entire sample and the lower plot shows split participants into European ancestry and other ancestries.

AFR = African; AMR = Admixed American; EAS = East Asian; EUR = European; SAS = South Asian; ADSP = Alzheimer's Disease Sequencing Project; WGS = whole genome sequencing

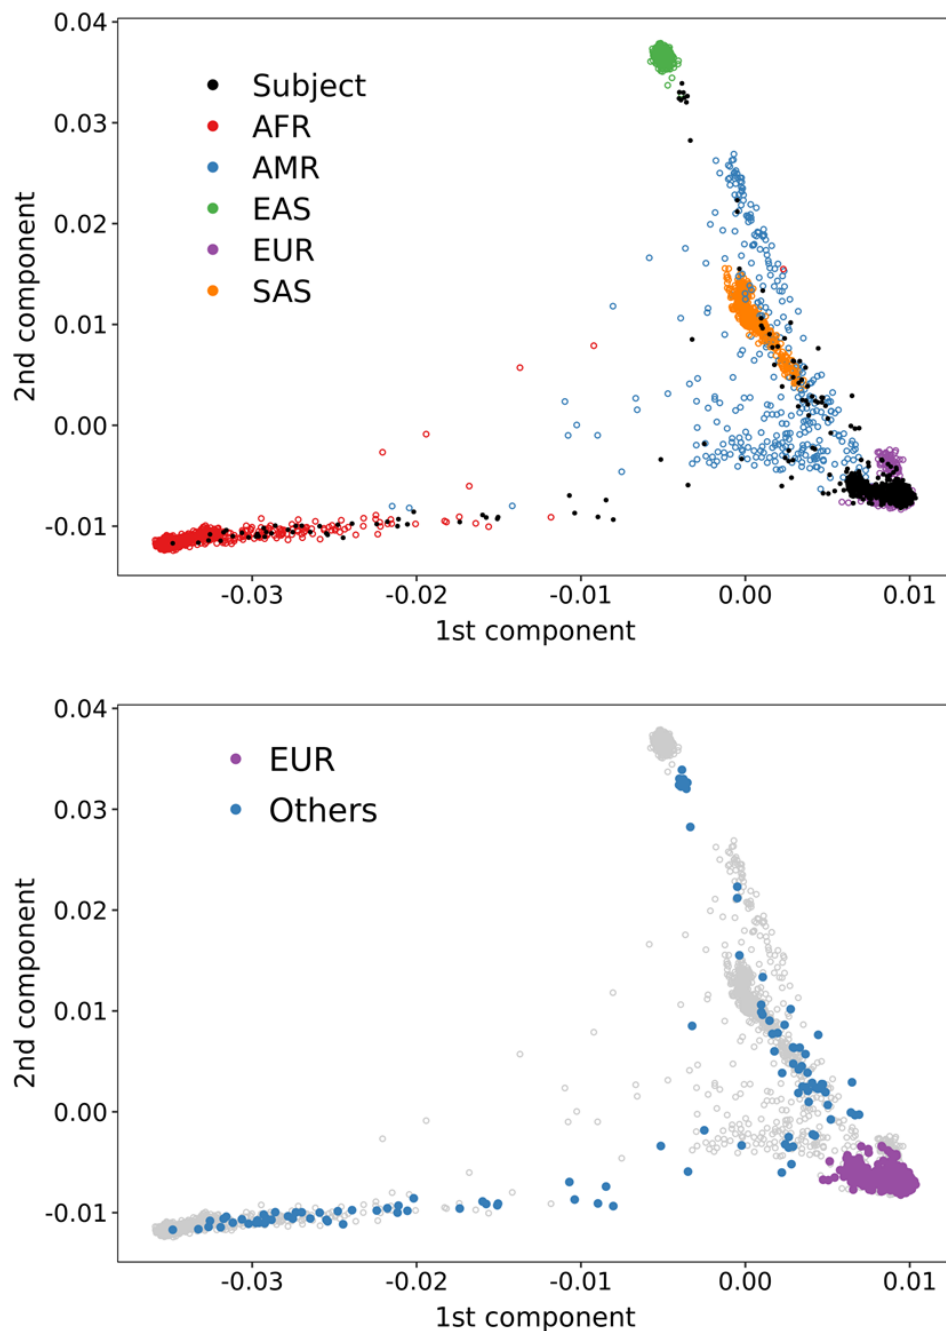

**Supplementary Figure 2.** First and second principal components plots along with 1000 genome reference samples. Block dots indicate individuals in the ADGC dataset. The upper plot represents the entire sample and the lower plot shows split participants into European ancestry and other ancestries.

AFR = African; AMR = Admixed American; EAS = East Asian; EUR = European; SAS = South Asian; ADGC = Alzheimer's Disease Genetics Consortium



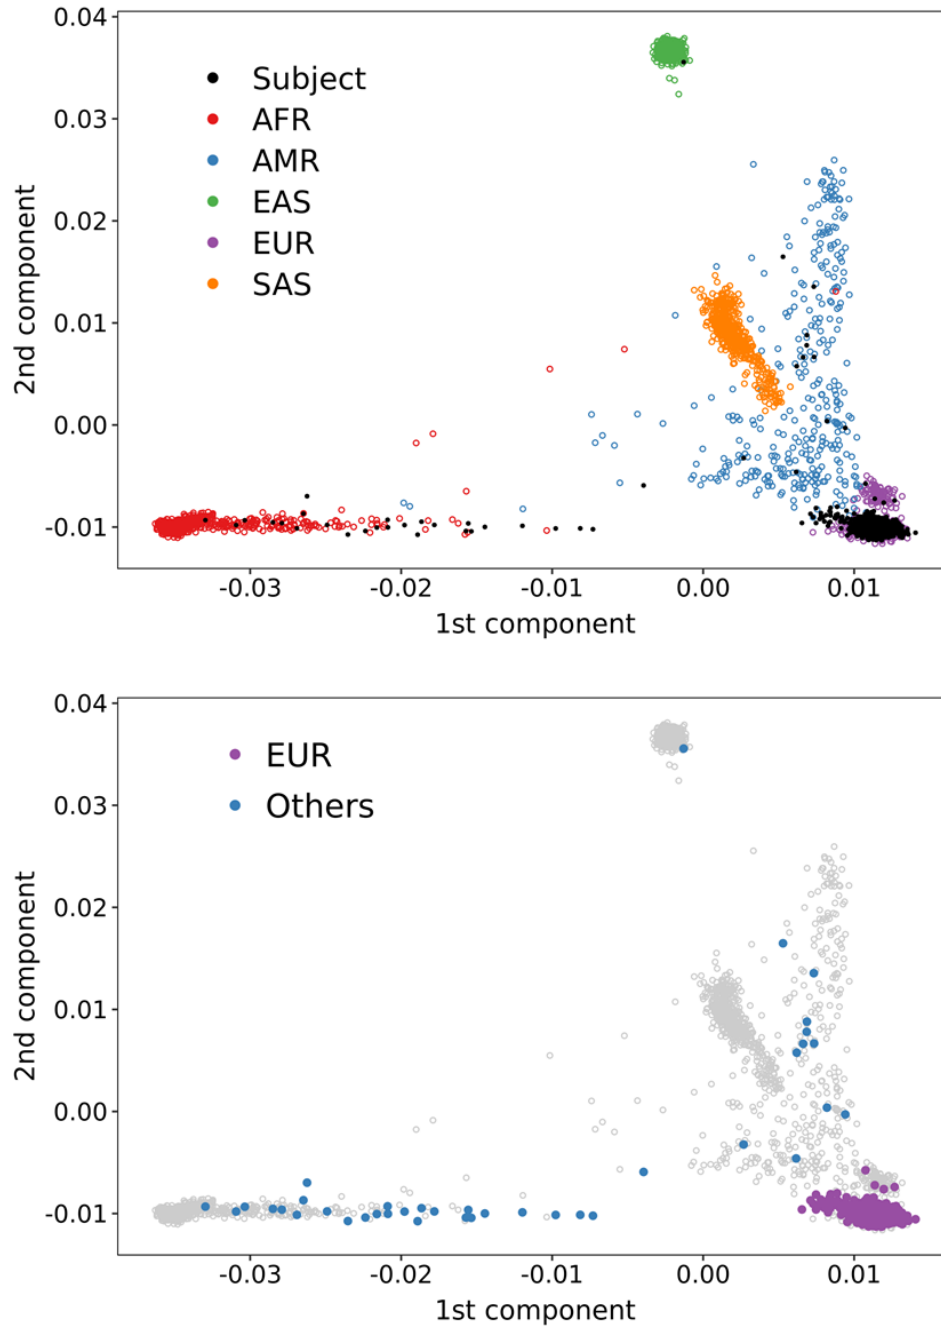

**Supplementary Figure 3.** First and second principal components plots along with 1000 genome reference samples. Block dots indicate individuals in the ROSMAP dataset. The upper plot represents the entire sample and the lower plot shows split participants into European ancestry and other ancestries.

AFR = African; AMR = Admixed American; EAS = East Asian; EUR = European; SAS = South Asian; ROSMAP = Religious Orders Study (ROS) and Memory and Aging Project (MAP)

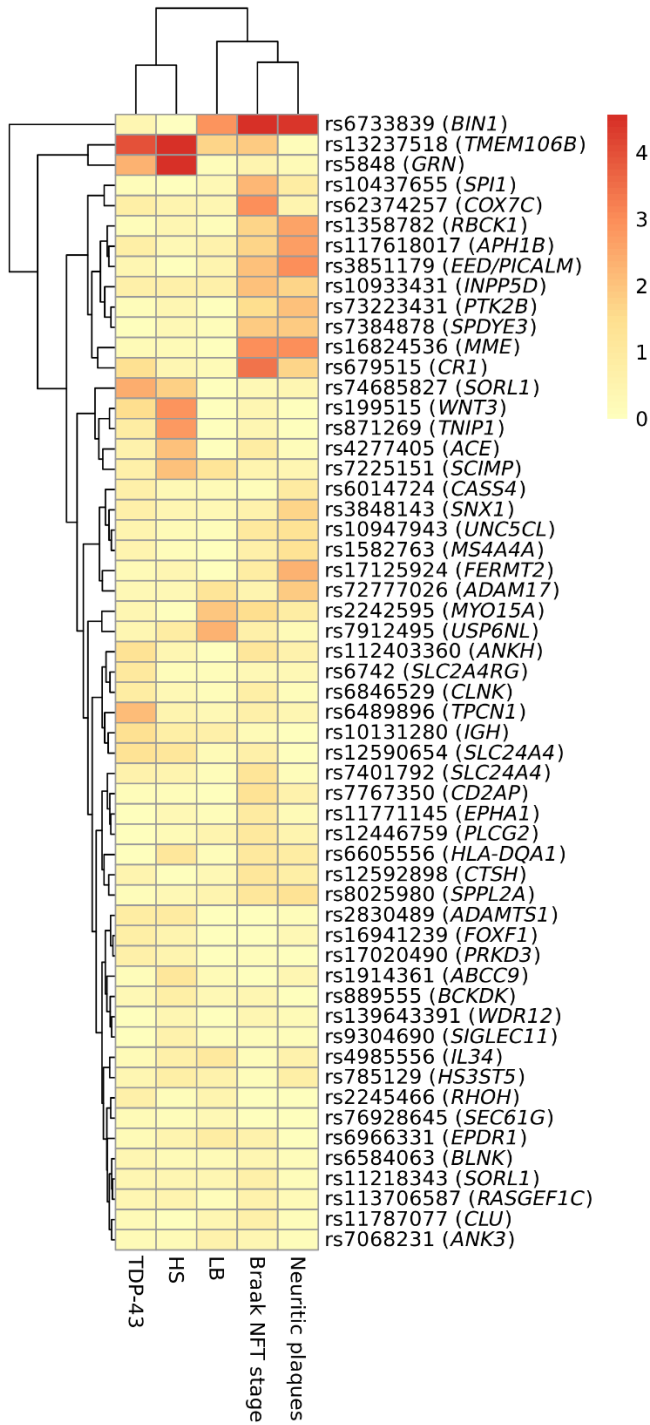

**Supplementary Figure 4.** Heatmap for  $-\log_{10}$  transformed p-values of all single nucleotide variants in people with European ancestry (excluding cases who had at least one rare disease) TDP-43 = TAR DNA binding protein 43 kDa; HS = hippocampal sclerosis; LB = Lewy bodies; NFT = neurofibrillary tangle

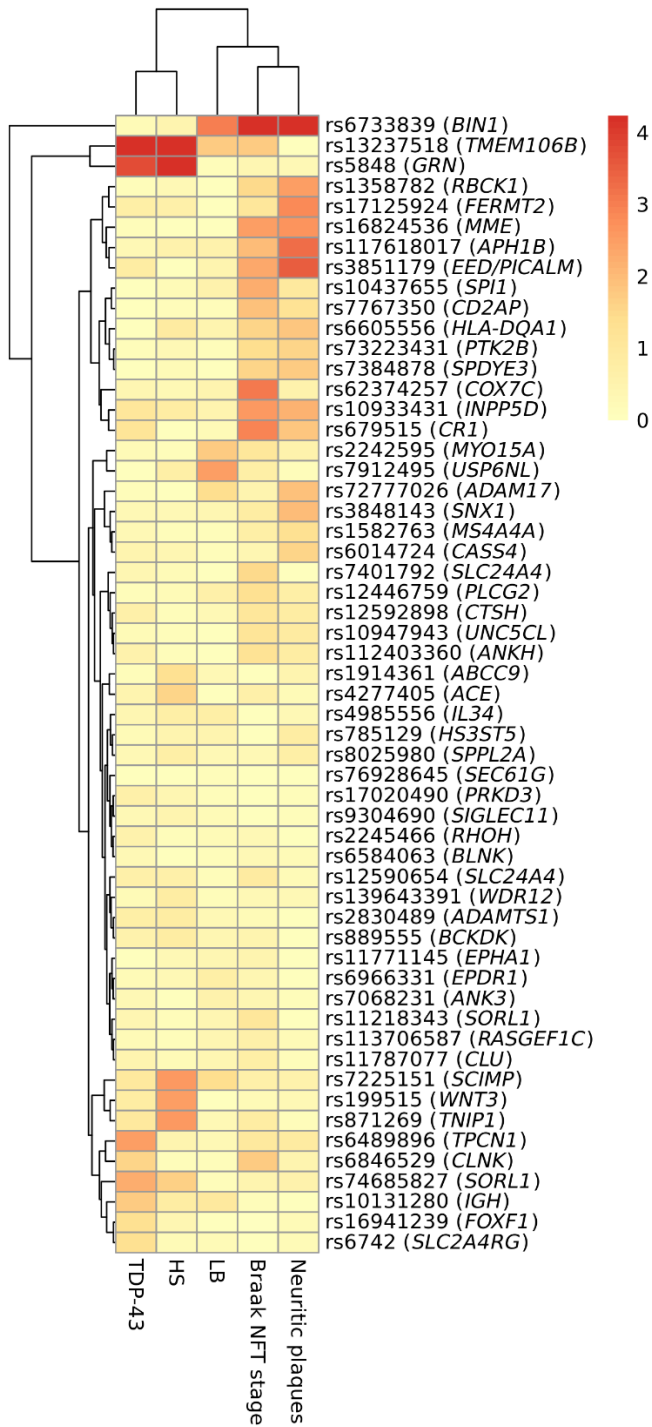

**Supplementary Figure 5.** Heatmap for  $-\log_{10}$  transformed p-values of all single nucleotide variants in people with European ancestry (including people with or without rare disease) TDP-43 = TAR DNA binding protein 43 kDa; HS = hippocampal sclerosis; LB = Lewy bodies; NFT = neurofibrillary tangle

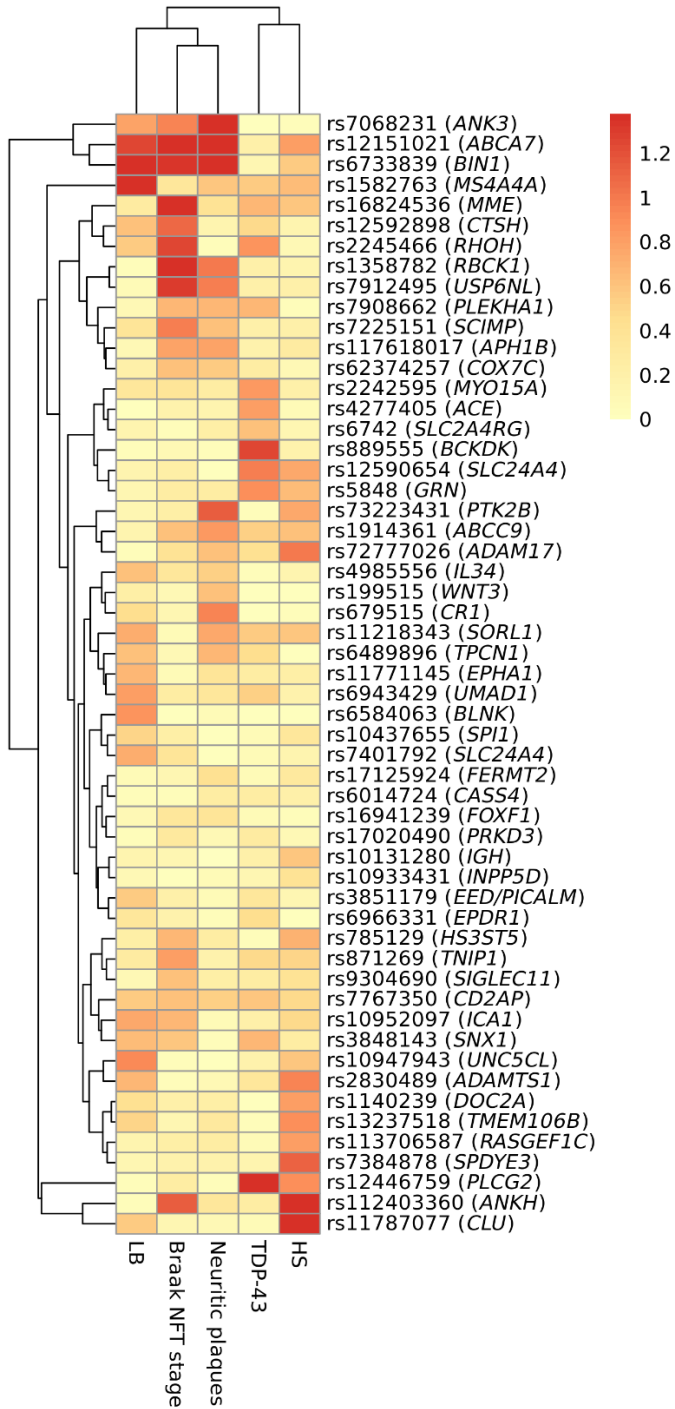

**Supplementary Figure 6.** Heatmap for  $-\log_{10}$  transformed p-values of all single nucleotide variants in people with other ancestries  
TDP-43 = TAR DNA binding protein 43 kDa; HS = hippocampal sclerosis; LB = Lewy bodies;  
NFT = neurofibrillary tangle
